# Supplementary material
Source: PubMed Central journal article supplement (PMC6885113)
Supplement: NIHMS1531481-supplement-01.pdf [file NIHMS1531481-supplement-01.pdf]

**Supplemental Dataset 1 Pathway analysis of differential gene expression in CK**  
**Summary of WikiPathways data-base analysis for CK uNK versus CK pNK. Frequency of significant differentially-expressed genes (p-value <0.05, Z-Score >1.96), based on Z score.**

**Criterion: ([LogFC CK uNK vs CK pNK] < -0.26 OR [LogFC CK uNK vs CK pNK] > 0.26 ) AND [P-value [LogFC CK uNK vs CK pNK] < 0.05**

| <b>Pathway</b>                                                                 | <b>positive</b> | <b>measured</b> | <b>total</b> | <b>%</b> | <b>Z Score</b> | <b>p-value</b> |
|--------------------------------------------------------------------------------|-----------------|-----------------|--------------|----------|----------------|----------------|
| HIF1A and PPARG regulation of glycolysis                                       | 6               | 6               | 19           | 100.00%  | 3.64           | 0              |
| TGF-beta Signaling Pathway                                                     | 51              | 111             | 133          | 45.95%   | 3.38           | 0.003          |
| Cori Cycle                                                                     | 8               | 10              | 53           | 80.00%   | 3.33           | 0              |
| Gastric Cancer Network 1                                                       | 14              | 22              | 30           | 63.64%   | 3.29           | 0.001          |
| Retinoblastoma Gene in Cancer                                                  | 38              | 80              | 98           | 47.50%   | 3.16           | 0.001          |
| Extracellular vesicle-mediated signaling in recipient cells                    | 12              | 19              | 31           | 63.16%   | 3.01           | 0              |
| Regulation of sister chromatid separation at metaphase-anaphase transition     | 10              | 15              | 16           | 66.67%   | 2.96           | 0.004          |
| Calcium Regulation in the Cardiac Cell                                         | 31              | 65              | 164          | 47.69%   | 2.88           | 0.003          |
| Primary Focal Segmental Glomerulosclerosis FSGS                                | 20              | 38              | 78           | 52.63%   | 2.86           | 0.003          |
| Fluoropyrimidine Activity                                                      | 13              | 22              | 58           | 59.09%   | 2.82           | 0.001          |
| Integrin-mediated Cell Adhesion                                                | 30              | 64              | 102          | 46.88%   | 2.72           | 0.004          |
| Focal Adhesion                                                                 | 46              | 108             | 201          | 42.59%   | 2.57           | 0.014          |
| Chemokine signaling pathway                                                    | 42              | 99              | 172          | 42.42%   | 2.42           | 0.024          |
| Ebola Virus Pathway on Host                                                    | 39              | 91              | 141          | 42.86%   | 2.41           | 0.018          |
| B Cell Receptor Signaling Pathway                                              | 36              | 83              | 99           | 43.37%   | 2.4            | 0.009          |
| Nanoparticle-mediated activation of receptor signaling                         | 12              | 22              | 36           | 54.55%   | 2.36           | 0.016          |
| Lamin A-processing pathway                                                     | 4               | 5               | 8            | 80.00%   | 2.35           | 0.015          |
| Signal Transduction of S1P Receptor                                            | 11              | 20              | 26           | 55.00%   | 2.3            | 0.022          |
| MFAP5-mediated ovarian cancer cell motility and invasiveness                   | 6               | 9               | 18           | 66.67%   | 2.29           | 0.026          |
| Microglia Pathogen Phagocytosis Pathway                                        | 15              | 30              | 44           | 50.00%   | 2.22           | 0.027          |
| Histone Modifications                                                          | 27              | 61              | 68           | 44.26%   | 2.21           | 0.024          |
| Association Between Physico-Chemical Features and Toxicity Associated Pathways | 22              | 48              | 78           | 45.83%   | 2.19           | 0.026          |
| Human Thyroid Stimulating Hormone (TSH) signaling pathway                      | 24              | 54              | 67           | 44.44%   | 2.1            | 0.032          |
| Mesodermal Commitment Pathway                                                  | 35              | 84              | 154          | 41.67%   | 2.08           | 0.024          |
| Apoptosis-related network due to altered Notch3 in ovarian cancer              | 20              | 44              | 54           | 45.45%   | 2.04           | 0.047          |
| Regulation of Wnt/B-catenin Signaling by Small Molecule Compounds              | 7               | 12              | 33           | 58.33%   | 2.03           | 0.036          |
| T-Cell antigen Receptor (TCR) Signaling Pathway                                | 32              | 77              | 93           | 41.56%   | 1.97           | 0.047          |

|                                                                                |    |    |     |        |      |       |
|--------------------------------------------------------------------------------|----|----|-----|--------|------|-------|
| Purine metabolism                                                              | 6  | 10 | 75  | 60.00% | 1.96 | 0.044 |
| G Protein Signaling Pathways                                                   | 25 | 58 | 97  | 43.10% | 1.96 | 0.047 |
| EDA Signalling in Hair Follicle Development                                    | 3  | 4  | 16  | 75.00% | 1.89 | 0.045 |
| miRNA targets in ECM and membrane receptors                                    | 3  | 4  | 46  | 75.00% | 1.89 | 0.055 |
| TCA Cycle Nutrient Utilization and Invasiveness of Ovarian Cancer              | 3  | 4  | 11  | 75.00% | 1.89 | 0.04  |
| Non-genomic actions of 1,25 dihydroxyvitamin D3                                | 21 | 48 | 97  | 43.75% | 1.88 | 0.062 |
| ErbB Signaling Pathway                                                         | 28 | 67 | 101 | 41.79% | 1.88 | 0.063 |
| Development and heterogeneity of the ILC family                                | 8  | 15 | 33  | 53.33% | 1.85 | 0.063 |
| Hypothesized Pathways in Pathogenesis of Cardiovascular Disease                | 8  | 15 | 27  | 53.33% | 1.85 | 0.045 |
| Vitamin D Receptor Pathway                                                     | 30 | 73 | 188 | 41.10% | 1.83 | 0.07  |
| Glycolysis and Gluconeogenesis                                                 | 14 | 30 | 69  | 46.67% | 1.83 | 0.067 |
| Pancreatic adenocarcinoma pathway                                              | 31 | 76 | 97  | 40.79% | 1.81 | 0.061 |
| T-Cell antigen Receptor (TCR) pathway during Staphylococcus aureus infection   | 21 | 49 | 70  | 42.86% | 1.76 | 0.08  |
| Phosphodiesterases in neuronal function                                        | 9  | 18 | 66  | 50.00% | 1.72 | 0.088 |
| Genotoxicity pathway                                                           | 23 | 55 | 65  | 41.82% | 1.7  | 0.077 |
| Regulation of Actin Cytoskeleton                                               | 34 | 86 | 159 | 39.53% | 1.67 | 0.105 |
| MAPK and NFkB Signalling Pathways Inhibited by Yersinia YopJ                   | 6  | 11 | 13  | 54.55% | 1.67 | 0.073 |
| Inhibition of exosome biogenesis and secretion by Manumycin A in CRPC cells    | 8  | 16 | 19  | 50.00% | 1.62 | 0.11  |
| Non-small cell lung cancer                                                     | 22 | 53 | 76  | 41.51% | 1.62 | 0.12  |
| Myometrial Relaxation and Contraction Pathways                                 | 33 | 84 | 161 | 39.29% | 1.6  | 0.102 |
| Signaling Pathways in Glioblastoma                                             | 28 | 70 | 88  | 40.00% | 1.59 | 0.111 |
| Epithelial to mesenchymal transition in colorectal cancer                      | 29 | 73 | 161 | 39.73% | 1.58 | 0.107 |
| Disorders of Folate Metabolism and Transport                                   | 5  | 9  | 46  | 55.56% | 1.58 | 0.108 |
| Ethanol metabolism resulting in production of ROS by CYP2E1                    | 5  | 9  | 28  | 55.56% | 1.58 | 0.111 |
| GPR40 Pathway                                                                  | 5  | 9  | 20  | 55.56% | 1.58 | 0.114 |
| Adipogenesis                                                                   | 30 | 76 | 132 | 39.47% | 1.56 | 0.118 |
| Factors and pathways affecting insulin-like growth factor (IGF1)-Akt signaling | 11 | 24 | 34  | 45.83% | 1.55 | 0.131 |
| MAPK Cascade                                                                   | 11 | 24 | 33  | 45.83% | 1.55 | 0.133 |
| IL-3 Signaling Pathway                                                         | 17 | 40 | 50  | 42.50% | 1.54 | 0.133 |
| Nucleotide Metabolism                                                          | 9  | 19 | 37  | 47.37% | 1.52 | 0.123 |
| Hypertrophy Model                                                              | 7  | 14 | 21  | 50.00% | 1.52 | 0.127 |
| TGF-beta Receptor Signaling                                                    | 15 | 35 | 56  | 42.86% | 1.49 | 0.154 |
| Arrhythmogenic Right Ventricular Cardiomyopathy                                | 12 | 27 | 81  | 44.44% | 1.48 | 0.13  |

|                                                              |    |     |     |         |      |       |
|--------------------------------------------------------------|----|-----|-----|---------|------|-------|
| Thyroxine (Thyroid Hormone) Production                       | 1  | 1   | 12  | 100.00% | 1.48 | 0.123 |
| Tyrosine Metabolism                                          | 1  | 1   | 23  | 100.00% | 1.48 | 0.137 |
| Bone Morphogenic Protein (BMP) Signalling and Regulation     | 4  | 7   | 13  | 57.14%  | 1.48 | 0.13  |
| NOTCH1 regulation of human endothelial cell calcification    | 4  | 7   | 18  | 57.14%  | 1.48 | 0.155 |
| Heart Development                                            | 8  | 17  | 48  | 47.06%  | 1.41 | 0.16  |
| ID signaling pathway                                         | 6  | 12  | 17  | 50.00%  | 1.4  | 0.197 |
| Striated Muscle Contraction Pathway                          | 6  | 12  | 39  | 50.00%  | 1.4  | 0.162 |
| miR-517 relationship with ARCN1 and USP1                     | 3  | 5   | 7   | 60.00%  | 1.39 | 0.109 |
| Serotonin and anxiety-related events                         | 3  | 5   | 16  | 60.00%  | 1.39 | 0.168 |
| Focal Adhesion-PI3K-Akt-mTOR-signaling pathway               | 55 | 152 | 305 | 36.18%  | 1.33 | 0.185 |
| Common Pathways Underlying Drug Addiction                    | 9  | 20  | 50  | 45.00%  | 1.33 | 0.186 |
| Rett syndrome causing genes                                  | 12 | 28  | 60  | 42.86%  | 1.33 | 0.2   |
| EV release from cardiac cells and their functional effects   | 2  | 3   | 17  | 66.67%  | 1.32 | 0.221 |
| Farnesoid X Receptor Pathway                                 | 2  | 3   | 21  | 66.67%  | 1.32 | 0.173 |
| Osteoblast Signaling                                         | 2  | 3   | 18  | 66.67%  | 1.32 | 0.175 |
| Oxytocin signaling                                           | 2  | 3   | 10  | 66.67%  | 1.32 | 0.22  |
| Synthesis and Degradation of Ketone Bodies                   | 2  | 3   | 13  | 66.67%  | 1.32 | 0.224 |
| Vitamins A and D - action mechanisms                         | 2  | 3   | 14  | 66.67%  | 1.32 | 0.239 |
| RalA downstream regulated genes                              | 5  | 10  | 13  | 50.00%  | 1.28 | 0.232 |
| Transcriptional cascade regulating adipogenesis              | 5  | 10  | 14  | 50.00%  | 1.28 | 0.222 |
| DNA Damage Response (only ATM dependent)                     | 33 | 88  | 118 | 37.50%  | 1.28 | 0.201 |
| T-Cell Receptor and Co-stimulatory Signaling                 | 10 | 23  | 45  | 43.48%  | 1.27 | 0.187 |
| Type 2 papillary renal cell carcinoma                        | 10 | 23  | 41  | 43.48%  | 1.27 | 0.192 |
| Sudden Infant Death Syndrome (SIDS) Susceptibility Pathways  | 28 | 74  | 182 | 37.84%  | 1.23 | 0.204 |
| BDNF-TrkB Signaling                                          | 11 | 26  | 38  | 42.31%  | 1.22 | 0.213 |
| Fatty Acid Biosynthesis                                      | 8  | 18  | 37  | 44.44%  | 1.21 | 0.223 |
| Physiological and Pathological Hypertrophy of the Heart      | 8  | 18  | 27  | 44.44%  | 1.21 | 0.24  |
| Hair Follicle Development: Cytodifferentiation (Part 3 of 3) | 12 | 29  | 92  | 41.38%  | 1.18 | 0.189 |
| Signaling of Hepatocyte Growth Factor Receptor               | 12 | 29  | 35  | 41.38%  | 1.18 | 0.265 |
| TYROBP Causal Network                                        | 17 | 43  | 61  | 39.53%  | 1.18 | 0.252 |
| Cell Cycle                                                   | 38 | 104 | 124 | 36.54%  | 1.18 | 0.257 |
| Canonical and Non-Canonical TGF-B signaling                  | 6  | 13  | 18  | 46.15%  | 1.16 | 0.204 |
| Melatonin metabolism and effects                             | 9  | 21  | 64  | 42.86%  | 1.15 | 0.247 |

|                                                                                      |    |     |     |        |      |       |
|--------------------------------------------------------------------------------------|----|-----|-----|--------|------|-------|
| Sphingolipid pathway                                                                 | 9  | 21  | 64  | 42.86% | 1.15 | 0.249 |
| Osteoclast Signaling                                                                 | 4  | 8   | 21  | 50.00% | 1.15 | 0.235 |
| Serotonin and anxiety                                                                | 4  | 8   | 22  | 50.00% | 1.15 | 0.226 |
| Pathways Affected in Adenoid Cystic Carcinoma                                        | 20 | 52  | 72  | 38.46% | 1.13 | 0.251 |
| Alzheimers Disease                                                                   | 21 | 55  | 166 | 38.18% | 1.12 | 0.284 |
| Metabolic reprogramming in colon cancer                                              | 15 | 38  | 81  | 39.47% | 1.1  | 0.307 |
| EGF/EGFR Signaling Pathway                                                           | 49 | 138 | 163 | 35.51% | 1.1  | 0.287 |
| Canonical and Non-canonical Notch signaling                                          | 7  | 16  | 31  | 43.75% | 1.08 | 0.294 |
| Wnt Signaling Pathway                                                                | 16 | 41  | 52  | 39.02% | 1.08 | 0.318 |
| Endochondral Ossification                                                            | 11 | 27  | 69  | 40.74% | 1.07 | 0.307 |
| Endoderm Differentiation                                                             | 33 | 91  | 147 | 36.26% | 1.04 | 0.286 |
| Bladder Cancer                                                                       | 12 | 30  | 47  | 40.00% | 1.04 | 0.278 |
| Prostaglandin Synthesis and Regulation                                               | 8  | 19  | 61  | 42.11% | 1.02 | 0.274 |
| Vitamin D in inflammatory diseases                                                   | 8  | 19  | 25  | 42.11% | 1.02 | 0.304 |
| Osteopontin Signaling                                                                | 5  | 11  | 14  | 45.45% | 1.02 | 0.269 |
| TGF-B Signaling in Thyroid Cells for Epithelial-Mesenchymal Transition               | 5  | 11  | 20  | 45.45% | 1.02 | 0.283 |
| Pathways in clear cell renal cell carcinoma                                          | 22 | 59  | 92  | 37.29% | 1.01 | 0.308 |
| Caloric restriction and aging                                                        | 3  | 6   | 13  | 50.00% | 0.99 | 0.297 |
| Mammary gland development pathway - Embryonic development (Stage 1 of 4)             | 3  | 6   | 21  | 50.00% | 0.99 | 0.299 |
| Nicotine Activity on Dopaminergic Neurons                                            | 3  | 6   | 31  | 50.00% | 0.99 | 0.308 |
| Alpha 6 Beta 4 signaling pathway                                                     | 9  | 22  | 34  | 40.91% | 0.98 | 0.329 |
| The effect of progerin on the involved genes in Hutchinson-Gilford Progeria Syndrome | 10 | 25  | 29  | 40.00% | 0.95 | 0.352 |
| miRNAs involved in DNA damage response                                               | 6  | 14  | 70  | 42.86% | 0.94 | 0.326 |
| Serotonin Receptor 2 and ELK-SRF/GATA4 signaling                                     | 6  | 14  | 24  | 42.86% | 0.94 | 0.359 |
| ESC Pluripotency Pathways                                                            | 19 | 51  | 123 | 37.25% | 0.93 | 0.336 |
| IL-4 Signaling Pathway                                                               | 19 | 51  | 56  | 37.25% | 0.93 | 0.356 |
| G1 to S cell cycle control                                                           | 20 | 54  | 66  | 37.04% | 0.92 | 0.348 |
| Corticotropin-releasing hormone signaling pathway                                    | 22 | 60  | 98  | 36.67% | 0.91 | 0.347 |
| Chromosomal and microsatellite instability in colorectal cancer                      | 23 | 63  | 81  | 36.51% | 0.91 | 0.346 |
| Prolactin Signaling Pathway                                                          | 25 | 69  | 79  | 36.23% | 0.9  | 0.355 |
| G13 Signaling Pathway                                                                | 12 | 31  | 39  | 38.71% | 0.9  | 0.37  |
| Brain-Derived Neurotrophic Factor (BDNF) signaling pathway                           | 36 | 102 | 150 | 35.29% | 0.89 | 0.384 |
| GPCRs, Other                                                                         | 7  | 17  | 118 | 41.18% | 0.89 | 0.379 |

|                                                                         |    |    |     |        |      |       |
|-------------------------------------------------------------------------|----|----|-----|--------|------|-------|
| GPCRs, Class A Rhodopsin-like                                           | 14 | 37 | 272 | 37.84% | 0.87 | 0.426 |
| Vitamin A and Carotenoid Metabolism                                     | 4  | 9  | 65  | 44.44% | 0.86 | 0.383 |
| One Carbon Metabolism                                                   | 8  | 20 | 57  | 40.00% | 0.85 | 0.384 |
| Tryptophan metabolism                                                   | 8  | 20 | 133 | 40.00% | 0.85 | 0.418 |
| Endometrial cancer                                                      | 18 | 49 | 75  | 36.73% | 0.83 | 0.426 |
| Kit receptor signaling pathway                                          | 18 | 49 | 60  | 36.73% | 0.83 | 0.405 |
| RAC1/PAK1/p38/MMP2 Pathway                                              | 18 | 49 | 74  | 36.73% | 0.83 | 0.407 |
| AMP-activated Protein Kinase (AMPK) Signaling                           | 19 | 52 | 78  | 36.54% | 0.83 | 0.382 |
| DNA IR-damage and cellular response via ATR                             | 25 | 70 | 90  | 35.71% | 0.81 | 0.407 |
| Cell-type Dependent Selectivity of CCK2R Signaling                      | 2  | 4  | 26  | 50.00% | 0.81 | 0.415 |
| miR-222 in Exercise-Induced Cardiac Growth                              | 2  | 4  | 5   | 50.00% | 0.81 | 0.422 |
| Phase I biotransformations, non P450                                    | 2  | 4  | 13  | 50.00% | 0.81 | 0.409 |
| Vitamin D Metabolism                                                    | 2  | 4  | 21  | 50.00% | 0.81 | 0.407 |
| Angiogenesis                                                            | 5  | 12 | 25  | 41.67% | 0.78 | 0.403 |
| Neovascularisation processes                                            | 5  | 12 | 25  | 41.67% | 0.78 | 0.413 |
| Initiation of transcription and translation elongation at the HIV-1 LTR | 11 | 29 | 35  | 37.93% | 0.78 | 0.447 |
| PDGF Pathway                                                            | 13 | 35 | 52  | 37.14% | 0.76 | 0.447 |
| Endothelin Pathways                                                     | 6  | 15 | 48  | 40.00% | 0.73 | 0.476 |
| TP53 Network                                                            | 6  | 15 | 23  | 40.00% | 0.73 | 0.476 |
| Nuclear Receptors                                                       | 7  | 18 | 44  | 38.89% | 0.7  | 0.471 |
| The human immune response to tuberculosis                               | 7  | 18 | 24  | 38.89% | 0.7  | 0.512 |
| miRs in Muscle Cell Differentiation                                     | 8  | 21 | 42  | 38.10% | 0.68 | 0.511 |
| Cell Differentiation - Index                                            | 3  | 7  | 56  | 42.86% | 0.66 | 0.525 |
| Differentiation of white and brown adipocyte                            | 3  | 7  | 26  | 42.86% | 0.66 | 0.52  |
| Ganglio Sphingolipid Metabolism                                         | 3  | 7  | 39  | 42.86% | 0.66 | 0.527 |
| Hedgehog Signaling Pathway                                              | 3  | 7  | 17  | 42.86% | 0.66 | 0.512 |
| Valproic acid pathway                                                   | 3  | 7  | 36  | 42.86% | 0.66 | 0.503 |
| Nucleotide-binding Oligomerization Domain (NOD) pathway                 | 11 | 30 | 43  | 36.67% | 0.64 | 0.554 |
| Hepatitis C and Hepatocellular Carcinoma                                | 13 | 36 | 63  | 36.11% | 0.63 | 0.552 |
| Exercise-induced Circadian Regulation                                   | 14 | 39 | 49  | 35.90% | 0.63 | 0.525 |
| Cardiac Progenitor Differentiation                                      | 4  | 10 | 56  | 40.00% | 0.6  | 0.55  |
| Eicosanoid Synthesis                                                    | 4  | 10 | 57  | 40.00% | 0.6  | 0.548 |
| Aflatoxin B1 metabolism                                                 | 1  | 2  | 16  | 50.00% | 0.57 | 0.566 |

|                                                                                    |    |     |     |        |      |       |
|------------------------------------------------------------------------------------|----|-----|-----|--------|------|-------|
| Blood Clotting Cascade                                                             | 1  | 2   | 27  | 50.00% | 0.57 | 0.588 |
| Hypothetical Craniofacial Development Pathway                                      | 1  | 2   | 11  | 50.00% | 0.57 | 0.562 |
| Hypoxia-mediated EMT and Stemness                                                  | 1  | 2   | 6   | 50.00% | 0.57 | 0.612 |
| miR-509-3p alteration of YAP1/ECM axis                                             | 1  | 2   | 19  | 50.00% | 0.57 | 0.607 |
| Ultraconserved region 339 modulation of tumor suppressor microRNAs in cancer       | 1  | 2   | 6   | 50.00% | 0.57 | 0.618 |
| TNF alpha Signaling Pathway                                                        | 28 | 82  | 97  | 34.15% | 0.57 | 0.571 |
| Circadian rhythm related genes                                                     | 41 | 122 | 210 | 33.61% | 0.57 | 0.565 |
| Simplified Interaction Map Between LOXL4 and Oxidative Stress Pathway              | 5  | 13  | 19  | 38.46% | 0.56 | 0.591 |
| Transcription factor regulation in adipogenesis                                    | 5  | 13  | 24  | 38.46% | 0.56 | 0.595 |
| Type II diabetes mellitus                                                          | 5  | 13  | 28  | 38.46% | 0.56 | 0.59  |
| Wnt Signaling                                                                      | 22 | 64  | 121 | 34.38% | 0.54 | 0.58  |
| 4-hydroxytamoxifen, Dexamethasone, and Retinoic Acids Regulation of p27 Expression | 6  | 16  | 31  | 37.50% | 0.54 | 0.602 |
| Imatinib and Chronic Myeloid Leukemia                                              | 6  | 16  | 25  | 37.50% | 0.54 | 0.62  |
| Interactome of polycomb repressive complex 2 (PRC2)                                | 6  | 16  | 17  | 37.50% | 0.54 | 0.624 |
| MicroRNAs in cardiomyocyte hypertrophy                                             | 20 | 58  | 109 | 34.48% | 0.54 | 0.59  |
| Ethanol effects on histone modifications                                           | 7  | 19  | 53  | 36.84% | 0.53 | 0.579 |
| Synaptic Vesicle Pathway                                                           | 7  | 19  | 59  | 36.84% | 0.53 | 0.603 |
| Trans-sulfuration and one carbon metabolism                                        | 9  | 25  | 66  | 36.00% | 0.51 | 0.59  |
| Regulation of Microtubule Cytoskeleton                                             | 13 | 37  | 47  | 35.14% | 0.51 | 0.655 |
| PI3K-AKT-mTOR signaling pathway and therapeutic opportunities                      | 10 | 28  | 33  | 35.71% | 0.51 | 0.635 |
| Ras Signaling                                                                      | 38 | 114 | 192 | 33.33% | 0.49 | 0.604 |
| GPCRs, Class B Secretin-like                                                       | 2  | 5   | 24  | 40.00% | 0.42 | 0.63  |
| Liver X Receptor Pathway                                                           | 2  | 5   | 12  | 40.00% | 0.42 | 0.655 |
| LncRNA-mediated mechanisms of therapeutic resistance                               | 2  | 5   | 14  | 40.00% | 0.42 | 0.667 |
| Macrophage markers                                                                 | 2  | 5   | 10  | 40.00% | 0.42 | 0.668 |
| Role of Osx and miRNAs in tooth development                                        | 2  | 5   | 39  | 40.00% | 0.42 | 0.67  |
| RANKL/RANK (Receptor activator of NFKB (ligand)) Signaling Pathway                 | 16 | 47  | 58  | 34.04% | 0.42 | 0.673 |
| Cardiac Hypertrophic Response                                                      | 14 | 41  | 61  | 34.15% | 0.4  | 0.642 |
| IL-5 Signaling Pathway                                                             | 12 | 35  | 41  | 34.29% | 0.39 | 0.674 |
| Neural Crest Differentiation                                                       | 12 | 35  | 102 | 34.29% | 0.39 | 0.697 |
| Target Of Rapamycin (TOR) Signaling                                                | 11 | 32  | 40  | 34.38% | 0.38 | 0.666 |
| BMP Signaling Pathway in Eyelid Development                                        | 3  | 8   | 23  | 37.50% | 0.38 | 0.697 |
| DNA Mismatch Repair                                                                | 3  | 8   | 10  | 37.50% | 0.38 | 0.744 |

|                                                                            |    |     |     |        |      |       |
|----------------------------------------------------------------------------|----|-----|-----|--------|------|-------|
| Globo Sphingolipid Metabolism                                              | 3  | 8   | 29  | 37.50% | 0.38 | 0.664 |
| Cell Differentiation - Index expanded                                      | 4  | 11  | 69  | 36.36% | 0.37 | 0.738 |
| H19 action Rb-E2F1 signaling and CDK-Beta-catenin activity                 | 4  | 11  | 17  | 36.36% | 0.37 | 0.784 |
| Cannabinoid receptor signaling                                             | 6  | 17  | 54  | 35.29% | 0.36 | 0.712 |
| Pyrimidine metabolism                                                      | 24 | 73  | 140 | 32.88% | 0.3  | 0.745 |
| Resistin as a regulator of inflammation                                    | 8  | 24  | 34  | 33.33% | 0.22 | 0.8   |
| Follicle Stimulating Hormone (FSH) signaling pathway                       | 7  | 21  | 28  | 33.33% | 0.21 | 0.846 |
| IL17 signaling pathway                                                     | 7  | 21  | 32  | 33.33% | 0.21 | 0.823 |
| Splicing factor NOVA regulated synaptic proteins                           | 7  | 21  | 44  | 33.33% | 0.21 | 0.813 |
| Leptin signaling pathway                                                   | 21 | 65  | 77  | 32.31% | 0.19 | 0.855 |
| IL-9 Signaling Pathway                                                     | 5  | 15  | 18  | 33.33% | 0.18 | 0.806 |
| Ovarian Infertility Genes                                                  | 5  | 15  | 33  | 33.33% | 0.18 | 0.825 |
| Wnt Signaling in Kidney Disease                                            | 5  | 15  | 39  | 33.33% | 0.18 | 0.846 |
| VEGFA-VEGFR2 Signaling Pathway                                             | 56 | 176 | 238 | 31.82% | 0.17 | 0.879 |
| Pathogenic Escherichia coli infection                                      | 12 | 37  | 79  | 32.43% | 0.16 | 0.875 |
| Amplification and Expansion of Oncogenic Pathways as Metastatic Traits     | 4  | 12  | 18  | 33.33% | 0.16 | 0.849 |
| Development of pulmonary dendritic cells and macrophage subsets            | 4  | 12  | 14  | 33.33% | 0.16 | 0.825 |
| Androgen receptor signaling pathway                                        | 25 | 78  | 90  | 32.05% | 0.16 | 0.882 |
| Extracellular vesicles in the crosstalk of cardiac cells                   | 3  | 9   | 30  | 33.33% | 0.14 | 0.903 |
| NAD metabolism, sirtuins and aging                                         | 3  | 9   | 16  | 33.33% | 0.14 | 0.884 |
| SRF and miRs in Smooth Muscle Differentiation and Proliferation            | 3  | 9   | 18  | 33.33% | 0.14 | 0.886 |
| PI3K-Akt Signaling Pathway                                                 | 51 | 161 | 359 | 31.68% | 0.12 | 0.879 |
| Alanine and aspartate metabolism                                           | 2  | 6   | 66  | 33.33% | 0.11 | 0.902 |
| Cytokines and Inflammatory Response                                        | 2  | 6   | 32  | 33.33% | 0.11 | 0.922 |
| Degradation pathway of sphingolipids, including diseases                   | 2  | 6   | 38  | 33.33% | 0.11 | 0.938 |
| exRNA mechanism of action and biogenesis                                   | 2  | 6   | 8   | 33.33% | 0.11 | 0.848 |
| Glucuronidation                                                            | 2  | 6   | 41  | 33.33% | 0.11 | 0.925 |
| Insulin signalling in human adipocytes (diabetic condition)                | 2  | 6   | 12  | 33.33% | 0.11 | 0.873 |
| Insulin signalling in human adipocytes (normal condition)                  | 2  | 6   | 16  | 33.33% | 0.11 | 0.902 |
| Methionine metabolism leading to Sulphur Amino Acids and related disorders | 2  | 6   | 41  | 33.33% | 0.11 | 0.911 |
| miRNA Biogenesis                                                           | 2  | 6   | 7   | 33.33% | 0.11 | 0.828 |
| Pyrimidine metabolism and related diseases                                 | 2  | 6   | 51  | 33.33% | 0.11 | 0.919 |
| Somatroph axis (GH) and its relationship to dietary restriction and aging  | 2  | 6   | 12  | 33.33% | 0.11 | 0.889 |

|                                                                    |    |    |     |        |       |       |
|--------------------------------------------------------------------|----|----|-----|--------|-------|-------|
| Type III interferon signaling                                      | 2  | 6  | 11  | 33.33% | 0.11  | 0.881 |
| Breast cancer pathway                                              | 27 | 85 | 167 | 31.76% | 0.11  | 0.92  |
| Fatty Acid Beta Oxidation                                          | 9  | 28 | 71  | 32.14% | 0.1   | 0.909 |
| Arachidonate Epoxygenase / Epoxide Hydrolase                       | 1  | 3  | 18  | 33.33% | 0.08  | 0.987 |
| FTO Obesity Variant Mechanism                                      | 1  | 3  | 11  | 33.33% | 0.08  | 0.913 |
| Hfe effect on hepcidin production                                  | 1  | 3  | 8   | 33.33% | 0.08  | 0.856 |
| Irinotecan Pathway                                                 | 1  | 3  | 18  | 33.33% | 0.08  | 0.992 |
| let-7 inhibition of ES cell reprogramming                          | 1  | 3  | 17  | 33.33% | 0.08  | 0.986 |
| Monoamine GPCRs                                                    | 1  | 3  | 43  | 33.33% | 0.08  | 0.925 |
| Nucleotide GPCRs                                                   | 1  | 3  | 15  | 33.33% | 0.08  | 0.974 |
| Serotonin Receptor 2 and STAT3 Signaling                           | 1  | 3  | 6   | 33.33% | 0.08  | 0.856 |
| Tgif disruption of Shh signaling                                   | 1  | 3  | 10  | 33.33% | 0.08  | 0.905 |
| Vitamin B6-dependent and responsive disorders                      | 1  | 3  | 28  | 33.33% | 0.08  | 0.955 |
| EPO Receptor Signaling                                             | 7  | 22 | 27  | 31.82% | 0.06  | 0.974 |
| Hematopoietic Stem Cell Gene Regulation by GABP alpha/beta Complex | 6  | 19 | 26  | 31.58% | 0.03  | 0.995 |
| IL-1 signaling pathway                                             | 16 | 51 | 57  | 31.37% | 0.02  | 0.994 |
| DNA IR-Double Strand Breaks (DSBs) and cellular response via ATM   | 15 | 48 | 65  | 31.25% | 0     | 0.993 |
| Notch Signaling Pathway                                            | 14 | 45 | 62  | 31.11% | -0.02 | 0.993 |
| PPAR signaling pathway                                             | 9  | 29 | 76  | 31.03% | -0.02 | 0.964 |
| Prader-Willi and Angelman Syndrome                                 | 9  | 29 | 90  | 31.03% | -0.02 | 0.986 |
| Prion disease pathway                                              | 9  | 29 | 36  | 31.03% | -0.02 | 0.981 |
| IL-2 Signaling Pathway                                             | 12 | 39 | 43  | 30.77% | -0.06 | 0.938 |
| IL-7 Signaling Pathway                                             | 7  | 23 | 26  | 30.43% | -0.08 | 0.965 |
| Tumor suppressor activity of SMARCB1                               | 7  | 23 | 35  | 30.43% | -0.08 | 0.938 |
| Cysteine and methionine catabolism                                 | 3  | 10 | 55  | 30.00% | -0.08 | 0.894 |
| Glutathione metabolism                                             | 3  | 10 | 57  | 30.00% | -0.08 | 0.92  |
| Nanoparticle triggered regulated necrosis                          | 3  | 10 | 25  | 30.00% | -0.08 | 0.931 |
| ncRNAs involved in STAT3 signaling in hepatocellular carcinoma     | 3  | 10 | 19  | 30.00% | -0.08 | 0.955 |
| Overview of nanoparticle effects                                   | 3  | 10 | 41  | 30.00% | -0.08 | 0.926 |
| Peptide GPCRs                                                      | 3  | 10 | 79  | 30.00% | -0.08 | 0.938 |
| Urea cycle and metabolism of amino groups                          | 3  | 10 | 71  | 30.00% | -0.08 | 0.915 |
| Wnt Signaling Pathway and Pluripotency                             | 19 | 62 | 106 | 30.65% | -0.1  | 0.909 |
| EBV LMP1 signaling                                                 | 6  | 20 | 25  | 30.00% | -0.12 | 0.915 |

|                                                                                                 |    |    |     |        |       |       |
|-------------------------------------------------------------------------------------------------|----|----|-----|--------|-------|-------|
| Disorders of the Krebs cycle                                                                    | 2  | 7  | 35  | 28.57% | -0.15 | 0.926 |
| Matrix Metalloproteinases                                                                       | 2  | 7  | 31  | 28.57% | -0.15 | 0.906 |
| Suppression of HMGB1 mediated inflammation by THBD                                              | 2  | 7  | 10  | 28.57% | -0.15 | 0.859 |
| Integrated Cancer Pathway                                                                       | 12 | 40 | 50  | 30.00% | -0.17 | 0.852 |
| Interleukin-11 Signaling Pathway                                                                | 11 | 37 | 45  | 29.73% | -0.2  | 0.853 |
| MECP2 and Associated Rett Syndrome                                                              | 11 | 37 | 101 | 29.73% | -0.2  | 0.828 |
| TNF related weak inducer of apoptosis (TWEAK) Signaling Pathway                                 | 11 | 37 | 45  | 29.73% | -0.2  | 0.841 |
| Gastric Cancer Network 2                                                                        | 7  | 24 | 33  | 29.17% | -0.22 | 0.799 |
| One carbon metabolism and related pathways                                                      | 9  | 31 | 94  | 29.03% | -0.27 | 0.791 |
| Acetylcholine Synthesis                                                                         | 1  | 4  | 18  | 25.00% | -0.27 | 0.781 |
| BMP2-WNT4-FOXO1 Pathway in Human Primary Endometrial Stromal Cell Differentiation               | 1  | 4  | 16  | 25.00% | -0.27 | 0.79  |
| Drug Induction of Bile Acid Pathway                                                             | 1  | 4  | 45  | 25.00% | -0.27 | 0.773 |
| Methylation Pathways                                                                            | 1  | 4  | 15  | 25.00% | -0.27 | 0.782 |
| MicroRNA for Targeting Cancer Growth and Vascularization in Glioblastoma                        | 1  | 4  | 10  | 25.00% | -0.27 | 0.736 |
| Molybdenum cofactor (Moco) biosynthesis                                                         | 1  | 4  | 20  | 25.00% | -0.27 | 0.776 |
| Oligodendrocyte Specification and differentiation(including remyelination), leading to Myelin C | 1  | 4  | 46  | 25.00% | -0.27 | 0.788 |
| PTF1A related regulatory pathway                                                                | 1  | 4  | 12  | 25.00% | -0.27 | 0.783 |
| Energy Metabolism                                                                               | 12 | 41 | 49  | 29.27% | -0.27 | 0.763 |
| Thymic Stromal LymphoPoietin (TSLP) Signaling Pathway                                           | 12 | 41 | 49  | 29.27% | -0.27 | 0.764 |
| Differentiation Pathway                                                                         | 3  | 11 | 64  | 27.27% | -0.28 | 0.76  |
| Monoamine Transport                                                                             | 3  | 11 | 47  | 27.27% | -0.28 | 0.796 |
| miRNA Regulation of DNA Damage Response                                                         | 18 | 61 | 106 | 29.51% | -0.29 | 0.797 |
| NRF2 pathway                                                                                    | 18 | 61 | 145 | 29.51% | -0.29 | 0.768 |
| DNA Damage Response                                                                             | 17 | 58 | 76  | 29.31% | -0.32 | 0.734 |
| Aryl Hydrocarbon Receptor                                                                       | 10 | 35 | 57  | 28.57% | -0.34 | 0.761 |
| Ectoderm Differentiation                                                                        | 22 | 75 | 145 | 29.33% | -0.36 | 0.688 |
| ERK Pathway in Huntington's Disease                                                             | 2  | 8  | 16  | 25.00% | -0.38 | 0.713 |
| Iron metabolism in placenta                                                                     | 2  | 8  | 15  | 25.00% | -0.38 | 0.75  |
| NLR Proteins                                                                                    | 2  | 8  | 11  | 25.00% | -0.38 | 0.723 |
| Small Ligand GPCRs                                                                              | 2  | 8  | 25  | 25.00% | -0.38 | 0.688 |
| Notch Signaling                                                                                 | 9  | 32 | 48  | 28.13% | -0.38 | 0.668 |
| Methionine De Novo and Salvage Pathway                                                          | 4  | 15 | 74  | 26.67% | -0.38 | 0.709 |
| TCA Cycle and Deficiency of Pyruvate Dehydrogenase complex (PDHc)                               | 4  | 15 | 37  | 26.67% | -0.38 | 0.686 |

|                                                                            |    |     |     |        |       |       |
|----------------------------------------------------------------------------|----|-----|-----|--------|-------|-------|
| Lung fibrosis                                                              | 6  | 22  | 85  | 27.27% | -0.4  | 0.675 |
| White fat cell differentiation                                             | 6  | 22  | 35  | 27.27% | -0.4  | 0.68  |
| Metapathway biotransformation Phase I and II                               | 14 | 49  | 191 | 28.57% | -0.4  | 0.694 |
| Triacylglyceride Synthesis                                                 | 3  | 12  | 37  | 25.00% | -0.47 | 0.63  |
| Type II interferon signaling (IFNG)                                        | 7  | 26  | 38  | 26.92% | -0.48 | 0.633 |
| Glycogen Synthesis and Degradation                                         | 9  | 33  | 54  | 27.27% | -0.49 | 0.66  |
| Interferon type I signaling pathways                                       | 14 | 50  | 57  | 28.00% | -0.5  | 0.632 |
| Mammary gland development pathway - Pregnancy and lactation (Stage 3 of 4) | 4  | 16  | 42  | 25.00% | -0.54 | 0.598 |
| MTHFR deficiency                                                           | 4  | 16  | 54  | 25.00% | -0.54 | 0.569 |
| Serotonin Receptor 4/6/7 and NR3C Signaling                                | 4  | 16  | 22  | 25.00% | -0.54 | 0.611 |
| Wnt/beta-catenin Signaling Pathway in Leukemia                             | 4  | 16  | 29  | 25.00% | -0.54 | 0.635 |
| Benzo(a)pyrene metabolism                                                  | 1  | 5   | 17  | 20.00% | -0.54 | 0.628 |
| Genes targeted by miRNAs in adipocytes                                     | 1  | 5   | 19  | 20.00% | -0.54 | 0.587 |
| Metabolism of Spingolipids in ER and Golgi apparatus                       | 1  | 5   | 69  | 20.00% | -0.54 | 0.564 |
| mir-124 predicted interactions with cell cycle and differentiation         | 1  | 5   | 8   | 20.00% | -0.54 | 0.641 |
| Oncostatin M Signaling Pathway                                             | 15 | 54  | 66  | 27.78% | -0.55 | 0.581 |
| Angiopietin Like Protein 8 Regulatory Pathway                              | 29 | 101 | 156 | 28.71% | -0.55 | 0.574 |
| Structural Pathway of Interleukin 1 (IL-1)                                 | 12 | 44  | 52  | 27.27% | -0.57 | 0.546 |
| Mammary gland development pathway - Puberty (Stage 2 of 4)                 | 2  | 9   | 15  | 22.22% | -0.58 | 0.554 |
| Trans-sulfuration pathway                                                  | 2  | 9   | 25  | 22.22% | -0.58 | 0.548 |
| Insulin Signaling                                                          | 39 | 135 | 162 | 28.89% | -0.6  | 0.536 |
| Oxidative Damage                                                           | 7  | 27  | 44  | 25.93% | -0.6  | 0.575 |
| MAPK Signaling Pathway                                                     | 45 | 155 | 259 | 29.03% | -0.6  | 0.571 |
| Phytochemical activity on NRF2 transcriptional activation                  | 3  | 13  | 20  | 23.08% | -0.64 | 0.539 |
| PI3K/AKT/mTOR - VitD3 Signalling                                           | 3  | 13  | 34  | 23.08% | -0.64 | 0.532 |
| IL-6 signaling pathway                                                     | 10 | 38  | 45  | 26.32% | -0.66 | 0.526 |
| Aryl Hydrocarbon Receptor Pathway                                          | 6  | 24  | 49  | 25.00% | -0.66 | 0.53  |
| Arylamine metabolism                                                       | 0  | 1   | 13  | 0.00%  | -0.67 | 0.519 |
| Biogenic Amine Synthesis                                                   | 0  | 1   | 33  | 0.00%  | -0.67 | 0.482 |
| Composition of Lipid Particles                                             | 0  | 1   | 21  | 0.00%  | -0.67 | 0.52  |
| Evolocumab Mechanism                                                       | 0  | 1   | 5   | 0.00%  | -0.67 | 0.476 |
| Fatty Acid Omega Oxidation                                                 | 0  | 1   | 20  | 0.00%  | -0.67 | 0.493 |
| Heroin metabolism                                                          | 0  | 1   | 8   | 0.00%  | -0.67 | 0.513 |

|                                                                                               |    |     |     |        |       |       |
|-----------------------------------------------------------------------------------------------|----|-----|-----|--------|-------|-------|
| Hormonal control of Pubertal Growth Spurt                                                     | 0  | 1   | 8   | 0.00%  | -0.67 | 0.492 |
| Influenza A virus infection                                                                   | 0  | 1   | 16  | 0.00%  | -0.67 | 0.506 |
| mir34a and TGIF2 in osteoclastogenesis                                                        | 0  | 1   | 5   | 0.00%  | -0.67 | 0.457 |
| Model for regulation of MSMP expression in cancer cells and its proangiogenic role in ovariar | 0  | 1   | 6   | 0.00%  | -0.67 | 0.493 |
| Proprotein convertase subtilisin/kexin type 9 (PCSK9) mediated LDL receptor degradation       | 0  | 1   | 3   | 0.00%  | -0.67 | 0.336 |
| SCFA and skeletal muscle substrate metabolism                                                 | 0  | 1   | 17  | 0.00%  | -0.67 | 0.508 |
| Mitochondrial Gene Expression                                                                 | 4  | 17  | 23  | 23.53% | -0.69 | 0.488 |
| NAD+ biosynthetic pathways                                                                    | 4  | 17  | 37  | 23.53% | -0.69 | 0.516 |
| miRNA regulation of p53 pathway in prostate cancer                                            | 5  | 21  | 37  | 23.81% | -0.74 | 0.448 |
| NRF2-ARE regulation                                                                           | 5  | 21  | 24  | 23.81% | -0.74 | 0.51  |
| ATM Signaling Network in Development and Disease                                              | 10 | 39  | 49  | 25.64% | -0.76 | 0.431 |
| Statin Pathway                                                                                | 2  | 10  | 50  | 20.00% | -0.77 | 0.463 |
| DDX1 as a regulatory component of the Drosha microprocessor                                   | 1  | 6   | 8   | 16.67% | -0.77 | 0.479 |
| Dual hijack model of Vif in HIV infection                                                     | 1  | 6   | 10  | 16.67% | -0.77 | 0.457 |
| Role Altered Glycolysation of MUC1 in Tumour Microenvironment                                 | 1  | 6   | 10  | 16.67% | -0.77 | 0.461 |
| Photodynamic therapy-induced HIF-1 survival signaling                                         | 6  | 25  | 38  | 24.00% | -0.78 | 0.423 |
| Inflammatory Response Pathway                                                                 | 3  | 14  | 34  | 21.43% | -0.79 | 0.426 |
| Oxidation by Cytochrome P450                                                                  | 3  | 14  | 75  | 21.43% | -0.79 | 0.444 |
| ncRNAs involved in Wnt signaling in hepatocellular carcinoma                                  | 11 | 43  | 89  | 25.58% | -0.8  | 0.427 |
| TCA Cycle (aka Krebs or citric acid cycle)                                                    | 4  | 18  | 49  | 22.22% | -0.83 | 0.411 |
| Fibrin Complement Receptor 3 Signaling Pathway                                                | 5  | 22  | 44  | 22.73% | -0.86 | 0.347 |
| ATM Signaling Pathway                                                                         | 8  | 33  | 50  | 24.24% | -0.87 | 0.338 |
| Photodynamic therapy-induced unfolded protein response                                        | 6  | 26  | 28  | 23.08% | -0.9  | 0.396 |
| Nuclear Receptors Meta-Pathway                                                                | 42 | 151 | 339 | 27.81% | -0.92 | 0.34  |
| Complement and Coagulation Cascades                                                           | 2  | 11  | 63  | 18.18% | -0.94 | 0.358 |
| Homologous recombination                                                                      | 2  | 11  | 14  | 18.18% | -0.94 | 0.402 |
| NAD+ metabolism                                                                               | 2  | 11  | 34  | 18.18% | -0.94 | 0.372 |
| Mitochondrial LC-Fatty Acid Beta-Oxidation                                                    | 3  | 15  | 24  | 20.00% | -0.94 | 0.35  |
| SREBF and miR33 in cholesterol and lipid homeostasis                                          | 3  | 15  | 19  | 20.00% | -0.94 | 0.364 |
| Integrated Breast Cancer Pathway                                                              | 38 | 138 | 201 | 27.54% | -0.95 | 0.358 |
| ACE Inhibitor Pathway                                                                         | 0  | 2   | 29  | 0.00%  | -0.95 | 0.347 |
| Benzene metabolism                                                                            | 0  | 2   | 17  | 0.00%  | -0.95 | 0.372 |
| Butyrate-induced histone acetylation                                                          | 0  | 2   | 11  | 0.00%  | -0.95 | 0.367 |

|                                                                         |    |    |     |        |       |       |
|-------------------------------------------------------------------------|----|----|-----|--------|-------|-------|
| Codeine and Morphine Metabolism                                         | 0  | 2  | 26  | 0.00%  | -0.95 | 0.346 |
| Complement Activation                                                   | 0  | 2  | 24  | 0.00%  | -0.95 | 0.362 |
| Mevalonate arm of cholesterol biosynthesis pathway with inhibitors      | 0  | 2  | 60  | 0.00%  | -0.95 | 0.349 |
| Polyol Pathway                                                          | 0  | 2  | 17  | 0.00%  | -0.95 | 0.405 |
| Sulindac Metabolic Pathway                                              | 0  | 2  | 11  | 0.00%  | -0.95 | 0.368 |
| Tamoxifen metabolism                                                    | 0  | 2  | 36  | 0.00%  | -0.95 | 0.357 |
| Non-homologous end joining                                              | 1  | 7  | 9   | 14.29% | -0.97 | 0.336 |
| Thiamine metabolic pathways                                             | 1  | 7  | 34  | 14.29% | -0.97 | 0.322 |
| Amino Acid metabolism                                                   | 15 | 59 | 205 | 25.42% | -0.97 | 0.323 |
| Senescence and Autophagy in Cancer                                      | 21 | 80 | 112 | 26.25% | -0.97 | 0.307 |
| Hedgehog Signaling Pathway                                              | 5  | 23 | 44  | 21.74% | -0.99 | 0.326 |
| Toll-like Receptor Signaling                                            | 5  | 23 | 32  | 21.74% | -0.99 | 0.318 |
| Thermogenesis                                                           | 19 | 74 | 140 | 25.68% | -1.04 | 0.291 |
| AGE/RAGE pathway                                                        | 13 | 53 | 67  | 24.53% | -1.06 | 0.292 |
| Lipid Metabolism Pathway                                                | 4  | 20 | 43  | 20.00% | -1.09 | 0.265 |
| Nanoparticle triggered autophagic cell death                            | 4  | 20 | 30  | 20.00% | -1.09 | 0.276 |
| Oxidative Stress                                                        | 4  | 20 | 35  | 20.00% | -1.09 | 0.274 |
| Leptin Insulin Overlap                                                  | 2  | 12 | 20  | 16.67% | -1.09 | 0.278 |
| LncRNA involvement in canonical Wnt signaling and colorectal cancer     | 12 | 50 | 102 | 24.00% | -1.11 | 0.245 |
| ATR Signaling                                                           | 1  | 8  | 10  | 12.50% | -1.14 | 0.317 |
| GABA receptor Signaling                                                 | 1  | 8  | 57  | 12.50% | -1.14 | 0.25  |
| Heme Biosynthesis                                                       | 1  | 8  | 28  | 12.50% | -1.14 | 0.272 |
| Mammary gland development pathway - Involution (Stage 4 of 4)           | 1  | 8  | 13  | 12.50% | -1.14 | 0.277 |
| Apoptosis Modulation and Signaling                                      | 18 | 72 | 97  | 25.00% | -1.15 | 0.269 |
| Dopaminergic Neurogenesis                                               | 0  | 3  | 32  | 0.00%  | -1.17 | 0.231 |
| eIF5A regulation in response to inhibition of the nuclear export system | 0  | 3  | 6   | 0.00%  | -1.17 | 0.212 |
| Glial Cell Differentiation                                              | 0  | 3  | 9   | 0.00%  | -1.17 | 0.231 |
| Glycine Metabolism                                                      | 0  | 3  | 19  | 0.00%  | -1.17 | 0.247 |
| Robo4 and VEGF Signaling Pathways Crosstalk                             | 0  | 3  | 7   | 0.00%  | -1.17 | 0.233 |
| Steroid Biosynthesis                                                    | 0  | 3  | 25  | 0.00%  | -1.17 | 0.226 |
| Spinal Cord Injury                                                      | 12 | 51 | 127 | 23.53% | -1.19 | 0.215 |
| DNA Replication                                                         | 9  | 40 | 50  | 22.50% | -1.2  | 0.224 |
| miRNAs involvement in the immune response in sepsis                     | 5  | 25 | 69  | 20.00% | -1.22 | 0.233 |

|                                                                                        |    |    |     |        |       |       |
|----------------------------------------------------------------------------------------|----|----|-----|--------|-------|-------|
| Human Complement System                                                                | 7  | 33 | 143 | 21.21% | -1.25 | 0.199 |
| Interleukin-1 Induced Activation of NF-kappa-B                                         | 1  | 9  | 13  | 11.11% | -1.3  | 0.247 |
| Photodynamic therapy-induced NF-kB survival signaling                                  | 4  | 22 | 36  | 18.18% | -1.32 | 0.175 |
| Glycerophospholipid Biosynthetic Pathway                                               | 3  | 18 | 94  | 16.67% | -1.34 | 0.175 |
| Photodynamic therapy-induced NFE2L2 (NRF2) survival signaling                          | 3  | 18 | 24  | 16.67% | -1.34 | 0.205 |
| Zinc homeostasis                                                                       | 3  | 18 | 39  | 16.67% | -1.34 | 0.18  |
| Ferroptosis                                                                            | 7  | 34 | 70  | 20.59% | -1.34 | 0.162 |
| Gene regulatory network modelling somitogenesis                                        | 0  | 4  | 13  | 0.00%  | -1.35 | 0.18  |
| MicroRNA network associated with chronic lymphocytic leukemia                          | 0  | 4  | 10  | 0.00%  | -1.35 | 0.147 |
| NAD Biosynthesis II (from tryptophan)                                                  | 0  | 4  | 34  | 0.00%  | -1.35 | 0.219 |
| Peroxisomal beta-oxidation of tetracosanoyl-CoA                                        | 0  | 4  | 17  | 0.00%  | -1.35 | 0.186 |
| Toll-like Receptor Signaling Pathway                                                   | 14 | 61 | 110 | 22.95% | -1.41 | 0.168 |
| Eukaryotic Transcription Initiation                                                    | 7  | 35 | 42  | 20.00% | -1.44 | 0.14  |
| Deregulation of Rab and Rab Effector Genes in Bladder Cancer                           | 1  | 10 | 17  | 10.00% | -1.45 | 0.15  |
| Kennedy pathway from Sphingolipids                                                     | 1  | 10 | 35  | 10.00% | -1.45 | 0.134 |
| Simplified Depiction of MYD88 Distinct Input-Output Pathway                            | 1  | 10 | 20  | 10.00% | -1.45 | 0.146 |
| Regulation of toll-like receptor signaling pathway                                     | 22 | 91 | 153 | 24.18% | -1.47 | 0.15  |
| IL1 and megakaryocytes in obesity                                                      | 2  | 15 | 26  | 13.33% | -1.5  | 0.122 |
| ApoE and miR-146 in inflammation and atherosclerosis                                   | 0  | 5  | 11  | 0.00%  | -1.51 | 0.078 |
| Folate-Alcohol and Cancer Pathway Hypotheses                                           | 0  | 5  | 24  | 0.00%  | -1.51 | 0.124 |
| Serotonin Transporter Activity                                                         | 0  | 5  | 15  | 0.00%  | -1.51 | 0.087 |
| Sulfation Biotransformation Reaction                                                   | 0  | 5  | 29  | 0.00%  | -1.51 | 0.134 |
| Sterol Regulatory Element-Binding Proteins (SREBP) signalling                          | 13 | 59 | 77  | 22.03% | -1.53 | 0.109 |
| TLR4 Signaling and Tolerance                                                           | 4  | 24 | 30  | 16.67% | -1.54 | 0.123 |
| Estrogen signaling pathway                                                             | 3  | 20 | 26  | 15.00% | -1.57 | 0.11  |
| NO/cGMP/PKG mediated Neuroprotection                                                   | 3  | 20 | 64  | 15.00% | -1.57 | 0.127 |
| Oxidative phosphorylation                                                              | 10 | 49 | 68  | 20.41% | -1.64 | 0.104 |
| RIG-I-like Receptor Signaling                                                          | 10 | 49 | 64  | 20.41% | -1.64 | 0.1   |
| Estrogen metabolism                                                                    | 0  | 6  | 45  | 0.00%  | -1.65 | 0.128 |
| Leptin and adiponectin                                                                 | 0  | 6  | 14  | 0.00%  | -1.65 | 0.082 |
| Metastatic brain tumor                                                                 | 0  | 6  | 28  | 0.00%  | -1.65 | 0.09  |
| Preimplantation Embryo                                                                 | 3  | 21 | 60  | 14.29% | -1.68 | 0.081 |
| Fas Ligand (FasL) pathway and Stress induction of Heat Shock Proteins (HSP) regulation | 7  | 38 | 48  | 18.42% | -1.71 | 0.093 |

|                                                                |    |     |     |        |       |       |
|----------------------------------------------------------------|----|-----|-----|--------|-------|-------|
| Constitutive Androstane Receptor Pathway                       | 1  | 12  | 34  | 8.33%  | -1.71 | 0.084 |
| Nuclear Receptors in Lipid Metabolism and Toxicity             | 1  | 12  | 48  | 8.33%  | -1.71 | 0.099 |
| PPAR Alpha Pathway                                             | 1  | 12  | 28  | 8.33%  | -1.71 | 0.083 |
| Copper homeostasis                                             | 6  | 34  | 58  | 17.65% | -1.72 | 0.071 |
| Translation Factors                                            | 9  | 46  | 51  | 19.57% | -1.72 | 0.095 |
| Regulation of Apoptosis by Parathyroid Hormone-related Protein | 2  | 17  | 24  | 11.76% | -1.74 | 0.071 |
| Dopamine metabolism                                            | 0  | 7   | 48  | 0.00%  | -1.78 | 0.068 |
| Pentose Phosphate Metabolism                                   | 0  | 7   | 21  | 0.00%  | -1.78 | 0.064 |
| TFs Regulate miRNAs related to cardiac hypertrophy             | 0  | 7   | 16  | 0.00%  | -1.78 | 0.056 |
| Folate Metabolism                                              | 5  | 31  | 139 | 16.13% | -1.82 | 0.062 |
| Pregnane X Receptor pathway                                    | 1  | 13  | 35  | 7.69%  | -1.83 | 0.079 |
| Viral Acute Myocarditis                                        | 11 | 56  | 109 | 19.64% | -1.88 | 0.066 |
| Estrogen Receptor Pathway                                      | 0  | 8   | 16  | 0.00%  | -1.91 | 0.044 |
| p38 MAPK Signaling Pathway                                     | 4  | 28  | 36  | 14.29% | -1.94 | 0.048 |
| Parkinsons Disease Pathway                                     | 4  | 28  | 84  | 14.29% | -1.94 | 0.061 |
| Cholesterol Biosynthesis Pathway                               | 1  | 14  | 32  | 7.14%  | -1.95 | 0.04  |
| Vitamin B12 Disorders                                          | 0  | 9   | 35  | 0.00%  | -2.02 | 0.038 |
| Amyotrophic lateral sclerosis (ALS)                            | 4  | 29  | 56  | 13.79% | -2.03 | 0.042 |
| Mitochondrial complex I assembly model OXPHOS system           | 8  | 46  | 61  | 17.39% | -2.04 | 0.042 |
| Nanomaterial induced apoptosis                                 | 2  | 20  | 30  | 10.00% | -2.05 | 0.039 |
| Nonalcoholic fatty liver disease                               | 28 | 124 | 170 | 22.58% | -2.11 | 0.035 |
| Apoptosis                                                      | 14 | 71  | 88  | 19.72% | -2.11 | 0.041 |
| Apoptosis Modulation by HSP70                                  | 1  | 17  | 22  | 5.88%  | -2.26 | 0.023 |
| Proteasome Degradation                                         | 8  | 53  | 67  | 15.09% | -2.55 | 0.01  |
| Selenium Metabolism and Selenoproteins                         | 3  | 31  | 56  | 9.68%  | -2.6  | 0.008 |
| Electron Transport Chain (OXPHOS system in mitochondria)       | 15 | 83  | 119 | 18.07% | -2.61 | 0.006 |
| Vitamin B12 Metabolism                                         | 1  | 21  | 118 | 4.76%  | -2.62 | 0.008 |
| Selenium Micronutrient Network                                 | 5  | 41  | 195 | 12.20% | -2.64 | 0.008 |
| Parkin-Ubiquitin Proteasomal System pathway                    | 8  | 55  | 75  | 14.55% | -2.69 | 0.005 |
| Allograft Rejection                                            | 2  | 32  | 113 | 6.25%  | -3.06 | 0.002 |
| Ciliary landscape                                              | 38 | 185 | 215 | 20.54% | -3.2  | 0.003 |
| mRNA Processing                                                | 15 | 118 | 130 | 12.71% | -4.39 | 0     |
| Cytoplasmic Ribosomal Proteins                                 | 3  | 80  | 89  | 3.75%  | -5.35 | 0     |

|                                                                                             |   |   |     |      |     |   |
|---------------------------------------------------------------------------------------------|---|---|-----|------|-----|---|
| Acrylamide Biotransformation and Exposure Biomarkers                                        | 0 | 0 | 10  | NaN% | NaN | 0 |
| Amino acid conjugation of benzoic acid                                                      | 0 | 0 | 14  | NaN% | NaN | 0 |
| Amino acid conjugation                                                                      | 0 | 0 | 7   | NaN% | NaN | 0 |
| Aripiprazole Metabolic Pathway                                                              | 0 | 0 | 7   | NaN% | NaN | 0 |
| Biochemical Pathways Part I                                                                 | 0 | 0 | 471 | NaN% | NaN | 0 |
| Biosynthesis and regeneration of tetrahydrobiopterin (BH4) and catabolism of phenylalanine, | 0 | 0 | 31  | NaN% | NaN | 0 |
| Caffeine and Theobromine metabolism                                                         | 0 | 0 | 17  | NaN% | NaN | 0 |
| Carnosine's role in muscle contraction                                                      | 0 | 0 | 14  | NaN% | NaN | 0 |
| Catalytic cycle of mammalian Flavin-containing MonoOxygenases (FMOs)                        | 0 | 0 | 14  | NaN% | NaN | 0 |
| Colchicine Metabolic Pathway                                                                | 0 | 0 | 5   | NaN% | NaN | 0 |
| Diclofenac Metabolic Pathway                                                                | 0 | 0 | 12  | NaN% | NaN | 0 |
| Effects of Nitric Oxide                                                                     | 0 | 0 | 16  | NaN% | NaN | 0 |
| FABP4 in ovarian cancer                                                                     | 0 | 0 | 3   | NaN% | NaN | 0 |
| Felbamate Metabolism                                                                        | 0 | 0 | 12  | NaN% | NaN | 0 |
| Gastric acid production                                                                     | 0 | 0 | 22  | NaN% | NaN | 0 |
| GHB metabolic pathway                                                                       | 0 | 0 | 25  | NaN% | NaN | 0 |
| Glucocorticoid and Mineralcorticoid Metabolism                                              | 0 | 0 | 26  | NaN% | NaN | 0 |
| Glucose Homeostasis                                                                         | 0 | 0 | 24  | NaN% | NaN | 0 |
| GPCRs, Class C Metabotropic glutamate, pheromone                                            | 0 | 0 | 15  | NaN% | NaN | 0 |
| Human metabolism overview                                                                   | 0 | 0 | 115 | NaN% | NaN | 0 |
| Lidocaine metabolism                                                                        | 0 | 0 | 11  | NaN% | NaN | 0 |
| Metabolism of Dichloroethylene by CYP450                                                    | 0 | 0 | 13  | NaN% | NaN | 0 |
| Metabolism of Tetrahydrocannabinol (THC)                                                    | 0 | 0 | 11  | NaN% | NaN | 0 |
| Mevalonate arm of cholesterol biosynthesis pathway                                          | 0 | 0 | 29  | NaN% | NaN | 0 |
| Modified nucleosides derived from t-RNA as urinary cancer markers                           | 0 | 0 | 21  | NaN% | NaN | 0 |
| Neurotransmitter Disorders                                                                  | 0 | 0 | 23  | NaN% | NaN | 0 |
| Nicotine Activity on Chromaffin Cells                                                       | 0 | 0 | 10  | NaN% | NaN | 0 |
| Nicotine Metabolism                                                                         | 0 | 0 | 18  | NaN% | NaN | 0 |
| Ophthalmate biosynthesis in hepatocytes                                                     | 0 | 0 | 10  | NaN% | NaN | 0 |
| Phosphatidylcholine catabolism                                                              | 0 | 0 | 32  | NaN% | NaN | 0 |
| Secretion of Hydrochloric Acid in Parietal Cells                                            | 0 | 0 | 15  | NaN% | NaN | 0 |

uNK versus CK pNK

total genes measured as a proportion of the total frequency of pathway enriched genes were ranked
