# Supplementary material
Source: PubMed Central journal article supplement (PMC6885113)
Supplement: NIHMS1531481-supplement-07.pdf [file NIHMS1531481-supplement-07.pdf]

Title: HIF1A and PPARG regulation of  
 Last modified: 10/16/2013  
 Organism: Homo sapiens

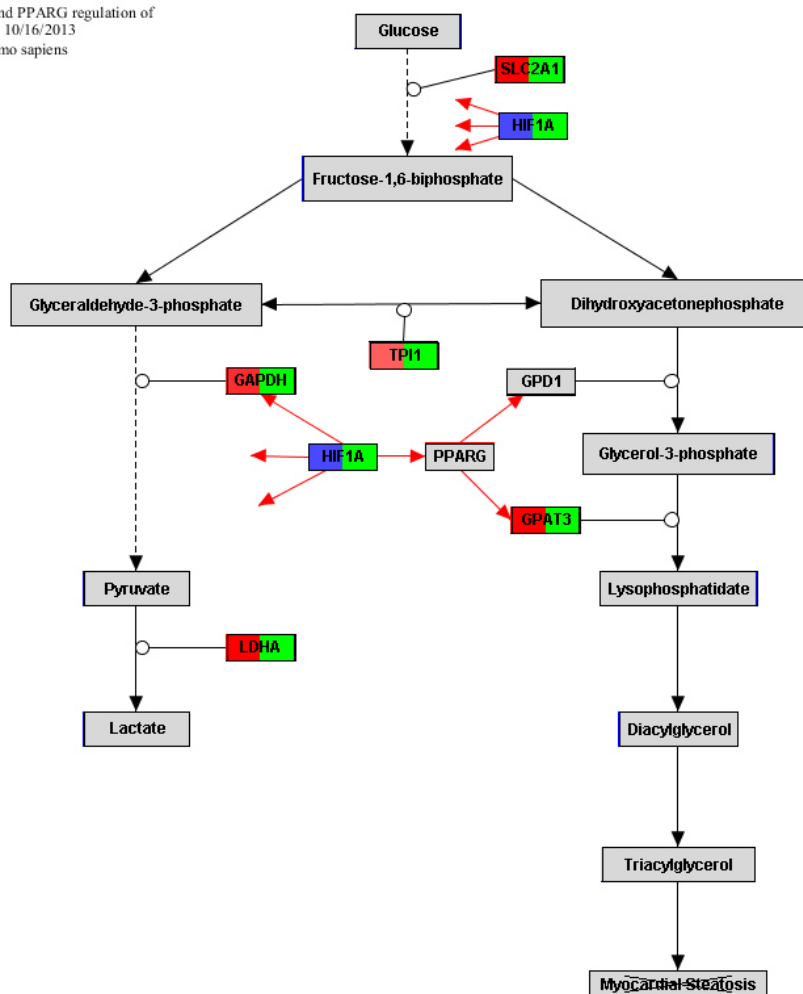

**Supplemental Figure 5B. Pathway analysis of HIF1A and PPARG regulation of glycolysis-related genes in CK-stimulated uNK versus CK-stimulated pNK.** Visualisation of genes with enhanced (red) or suppressed (blue) expression in cytokine-stimulated uNK versus cytokine-stimulated pNK. Individual genes are shown in boxes and box colour split into two parts, (1) the log2 fold-change in the left part of the box (blue down-regulated, white not changed, red up-regulated) and (2) the *p*-value for statistical significance is shown in the right part of the box (green when significant). Pathway elements including genes not assessed in the selected dataset are shown in grey.

TGF beta Signaling Pathway

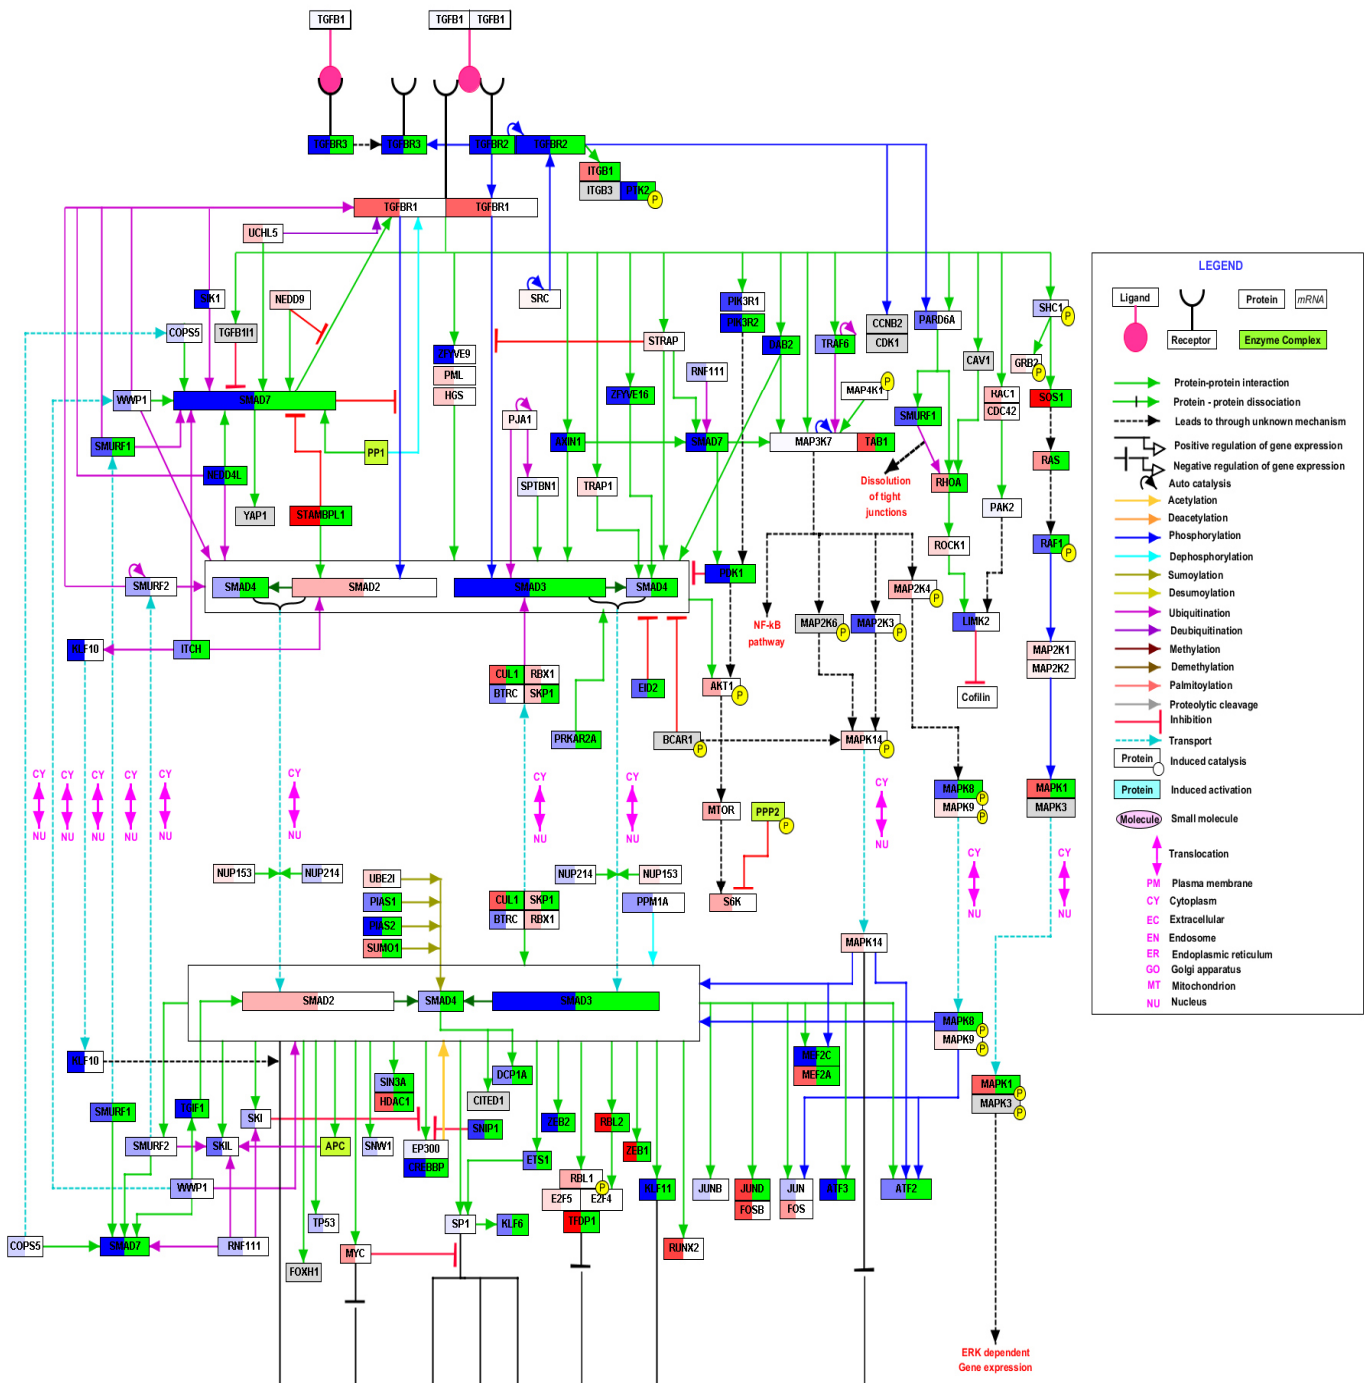

Supplemental Figure 5C. Pathway analysis of TGFβ signalling pathway in CK-stimulated uNK versus CK-stimulated pNK.

Title: Cori Cycle  
 Availability: CC BY 2.0  
 Last modified: 10/16/2013  
 Organism: Homo sapiens

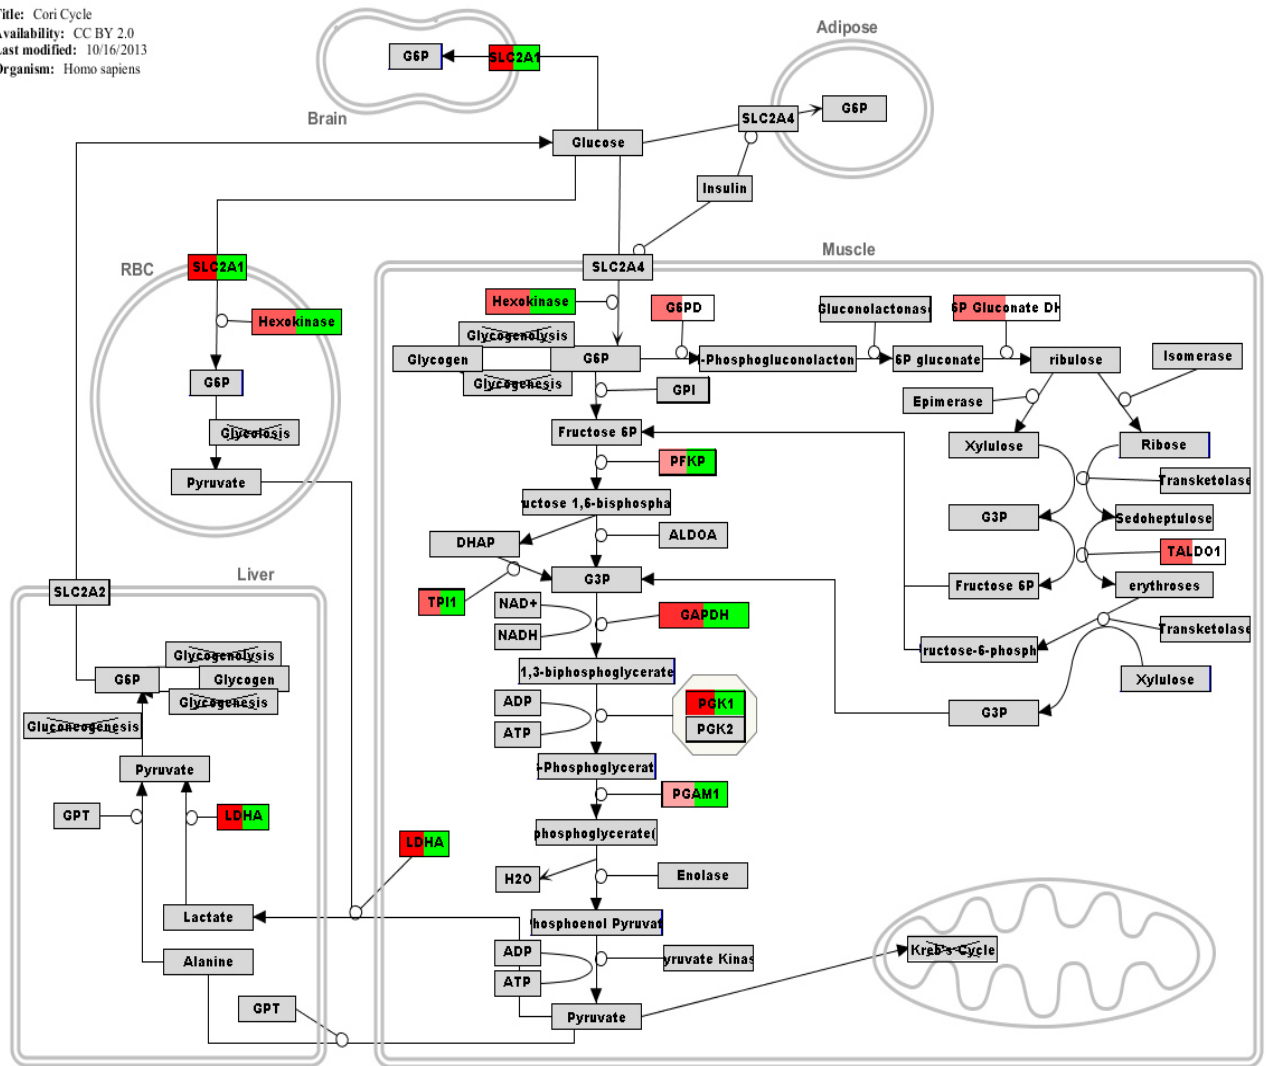

Supplemental Figure 5D. Pathway analysis of the Cori cycle in CK-stimulated uNK versus CK-stimulated pNK.

Title: Gastric Cancer Network 1  
 Last modified: 10/17/2013  
 Organism: Homo sapiens

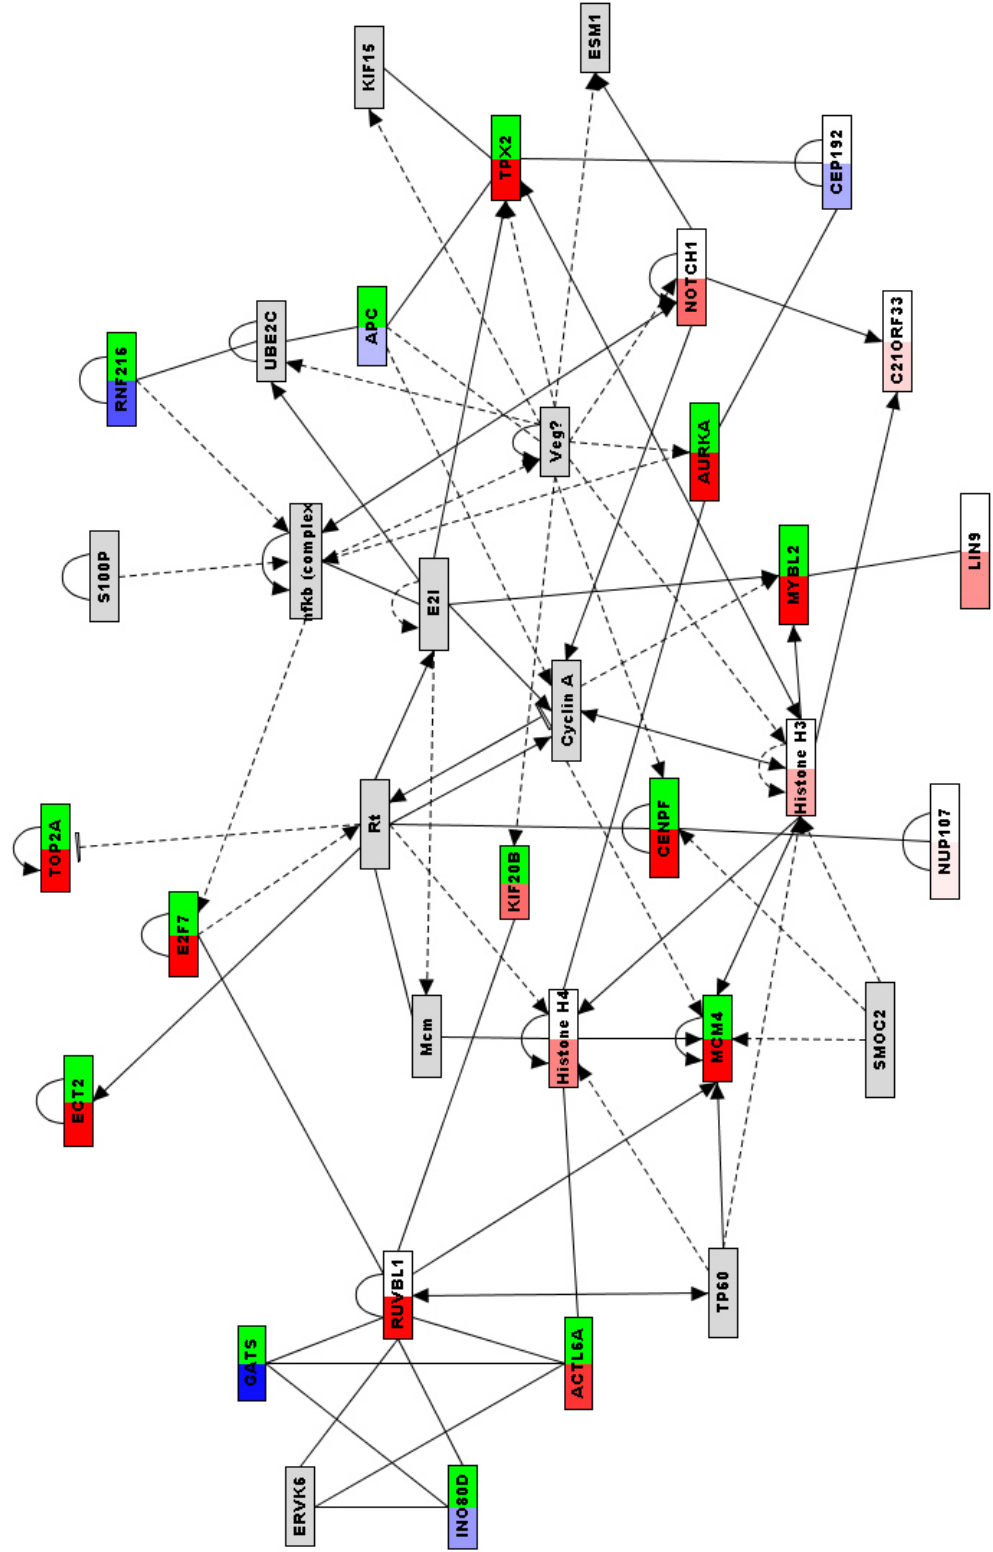

Supplemental Figure 5E. Pathway analysis of the gastric cancer network in CK-stimulated uNK versus CK-stimulated pNK.

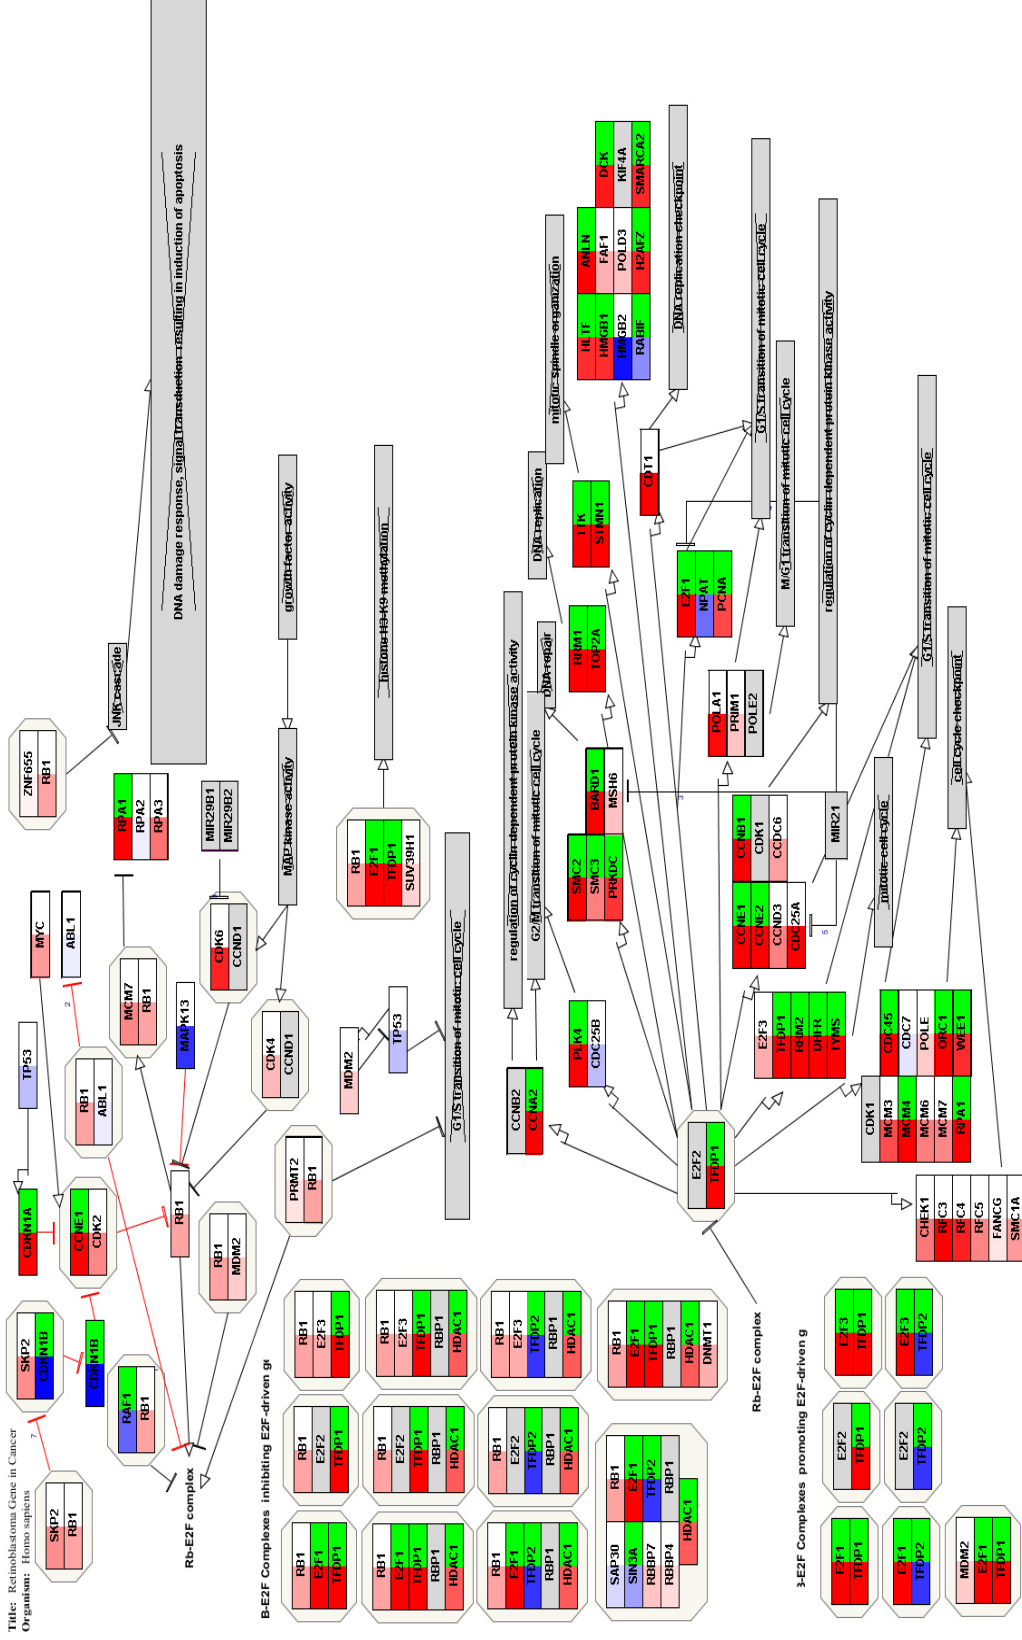

Supplemental Figure 5F. Pathway analysis of the Retinoblastoma gene in cancer in CK-stimulated uNK versus CK-stimulated pNK.

Title: Extracellular vesicle-mediated sig  
 Organism: Homo sapiens

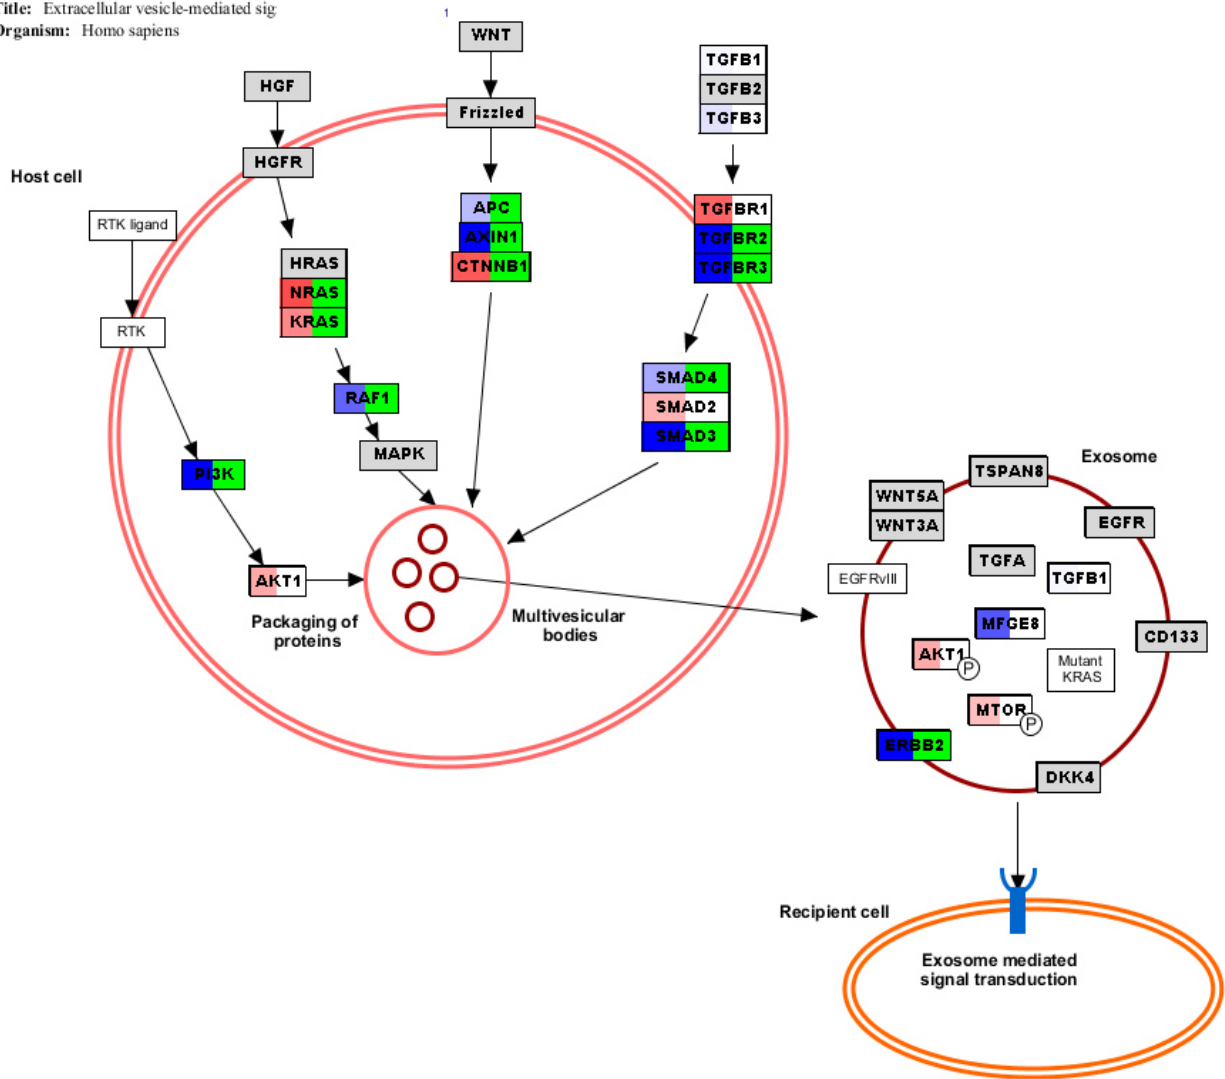

Supplemental Figure 5G. Pathway analysis of extracellular vesicle-mediated signaling in recipient cells in CK-stimulated uNK versus CK-stimulated pNK.

**Title:** Regulation of sister chromatid sep  
**Organism:** Homo sapiens

1

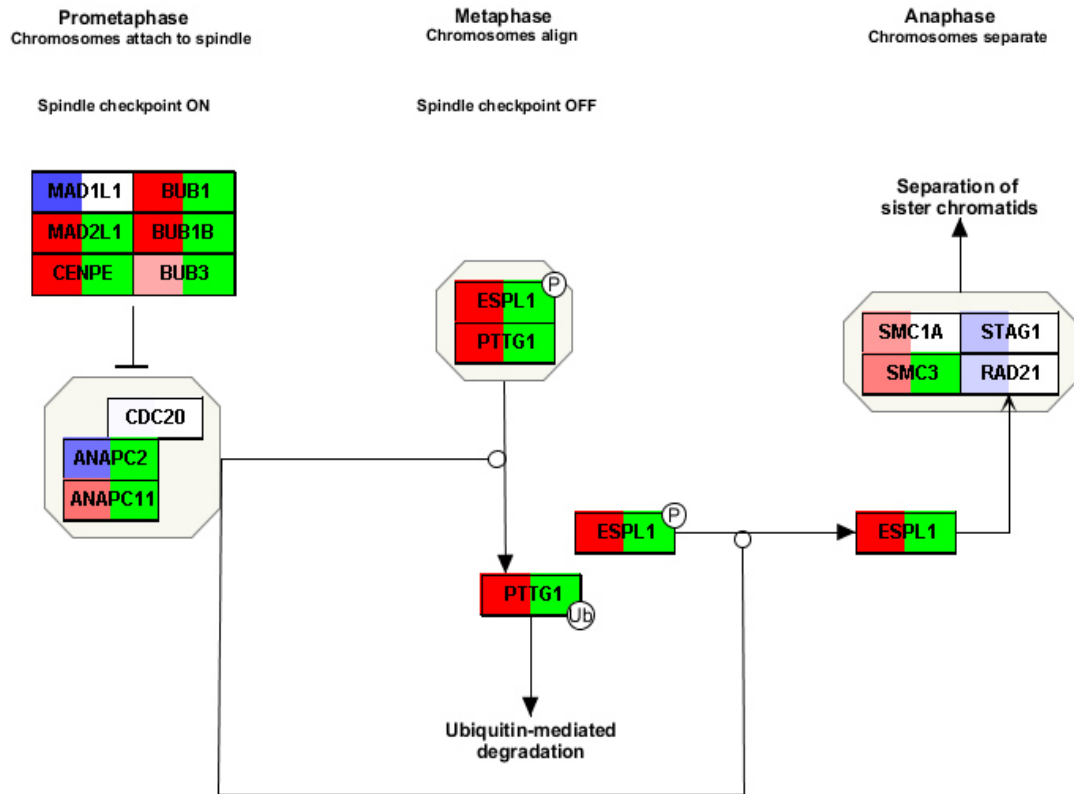

**Supplemental Figure 5H. Pathway analysis of Regulation of sister chromatid separation at metaphase-anaphase transition in CK-stimulated uNK versus CK-stimulated pNK.**



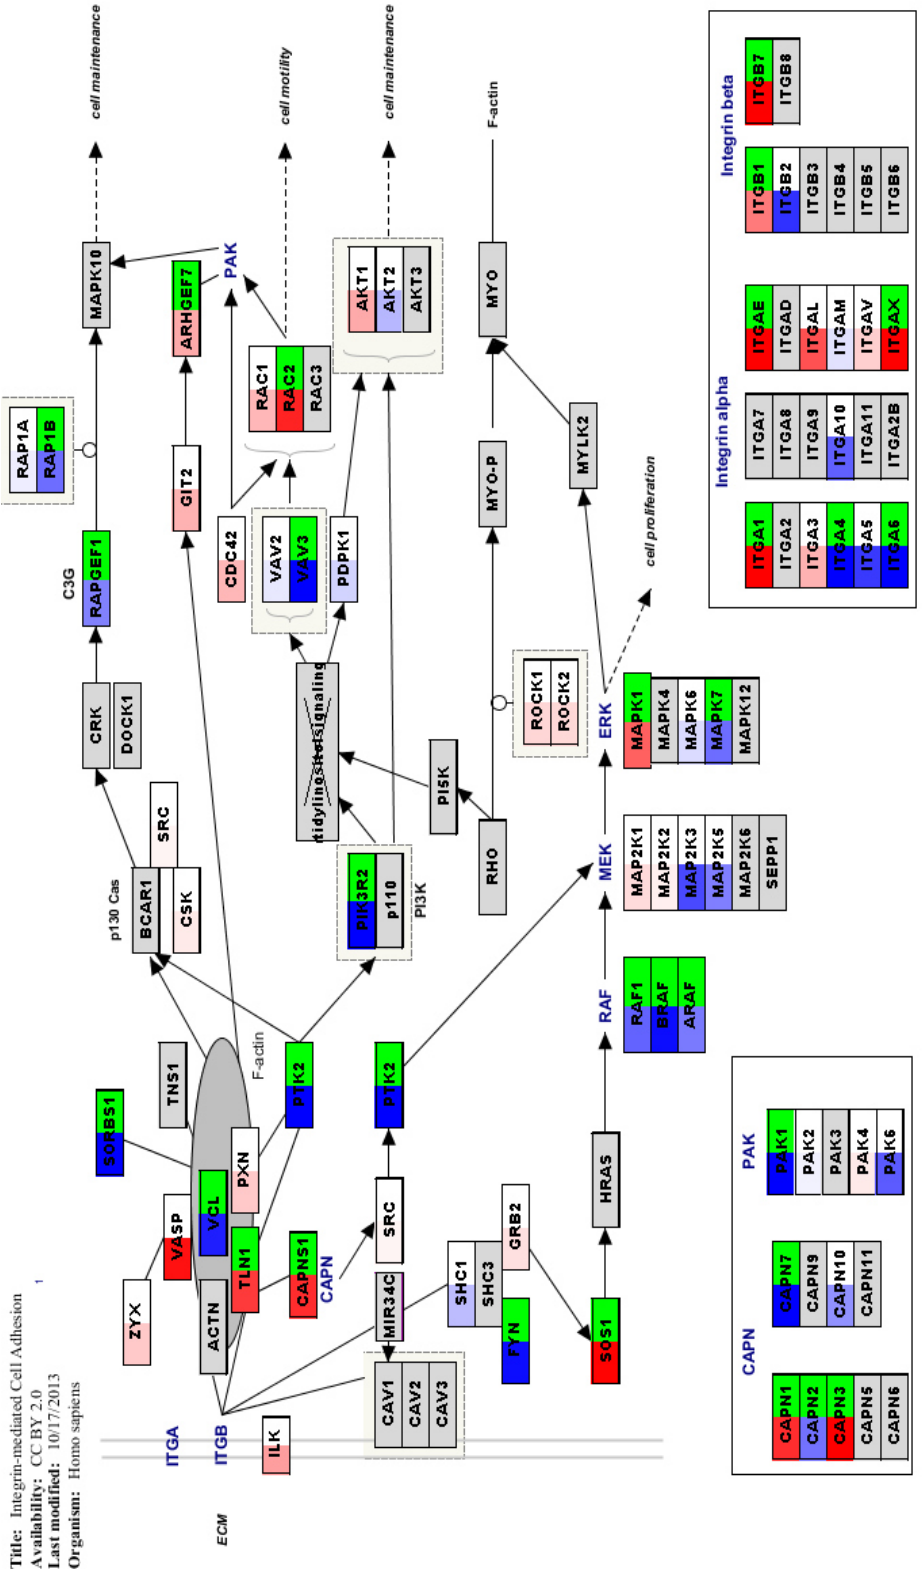

Supplemental Figure 5I. Pathway analysis of Fluoropyrimidine Activity in CK-stimulated uNK versus CK-stimulated pNK.

Title: Integrin-mediated Cell Adhesion  
 Availability: CC BY 2.0  
 Last modified: 10/17/2013  
 Organism: Homo sapiens

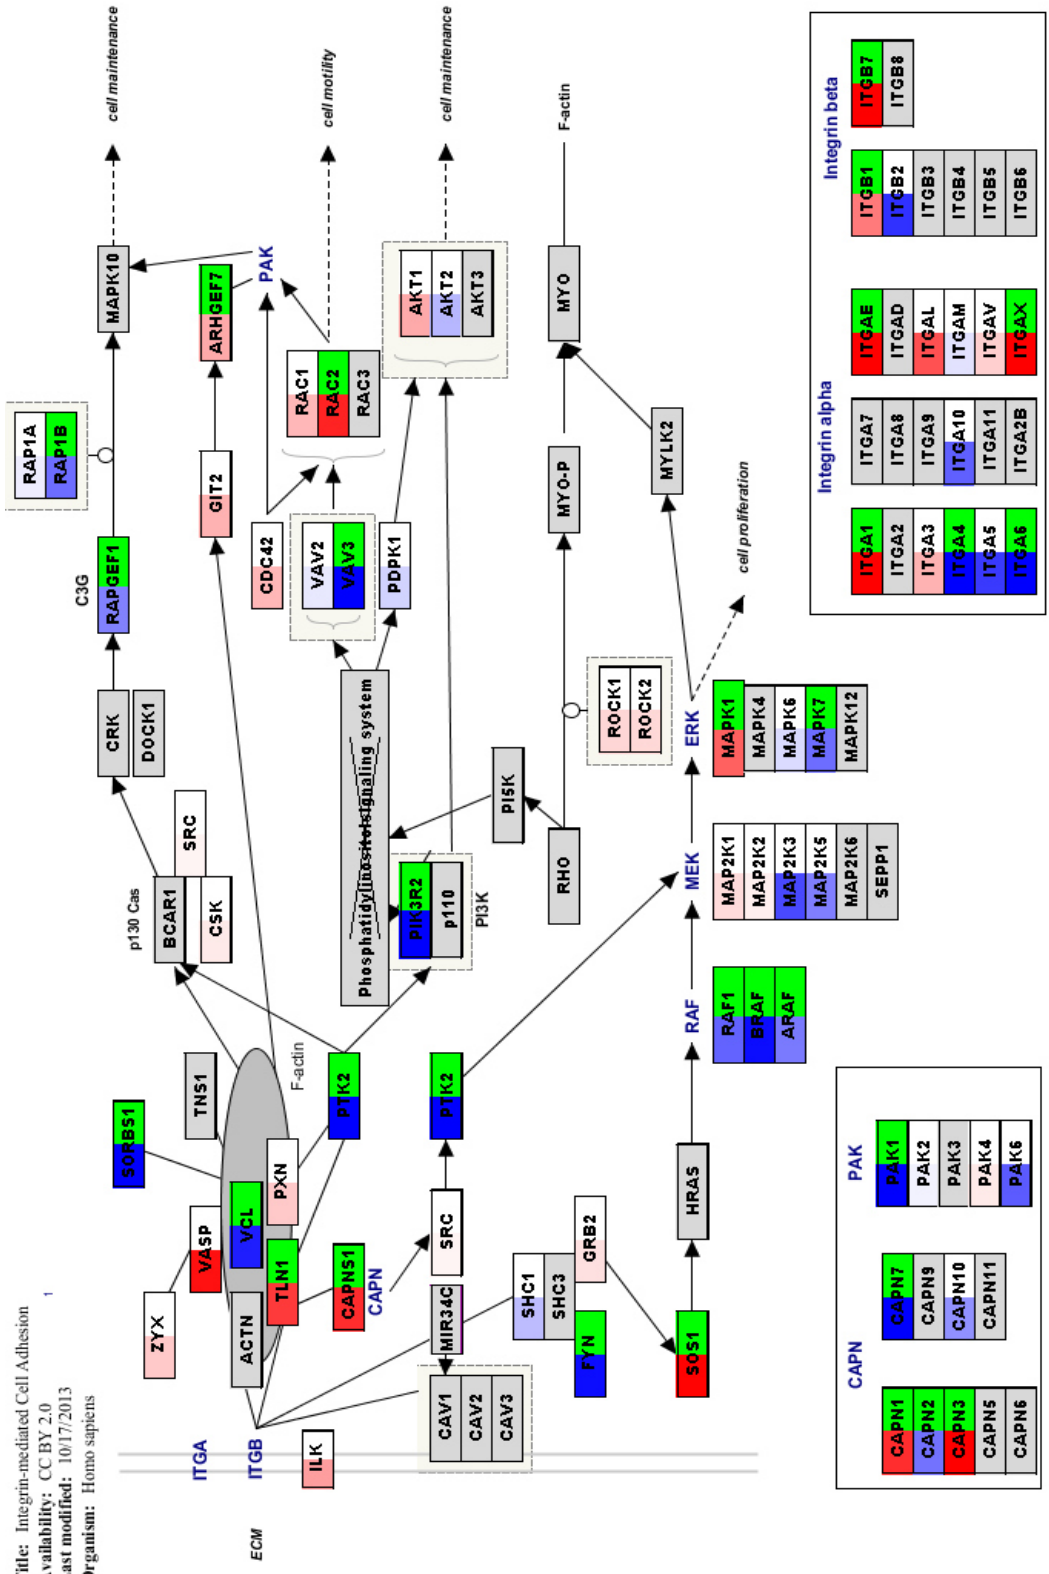

Supplemental Figure 5J. Pathway analysis of Integrin-mediated Cell Adhesion in CK-stimulated uNK versus CK-stimulated pNK.

Title: Focal Adhesion  
 Organization: Homo sapiens

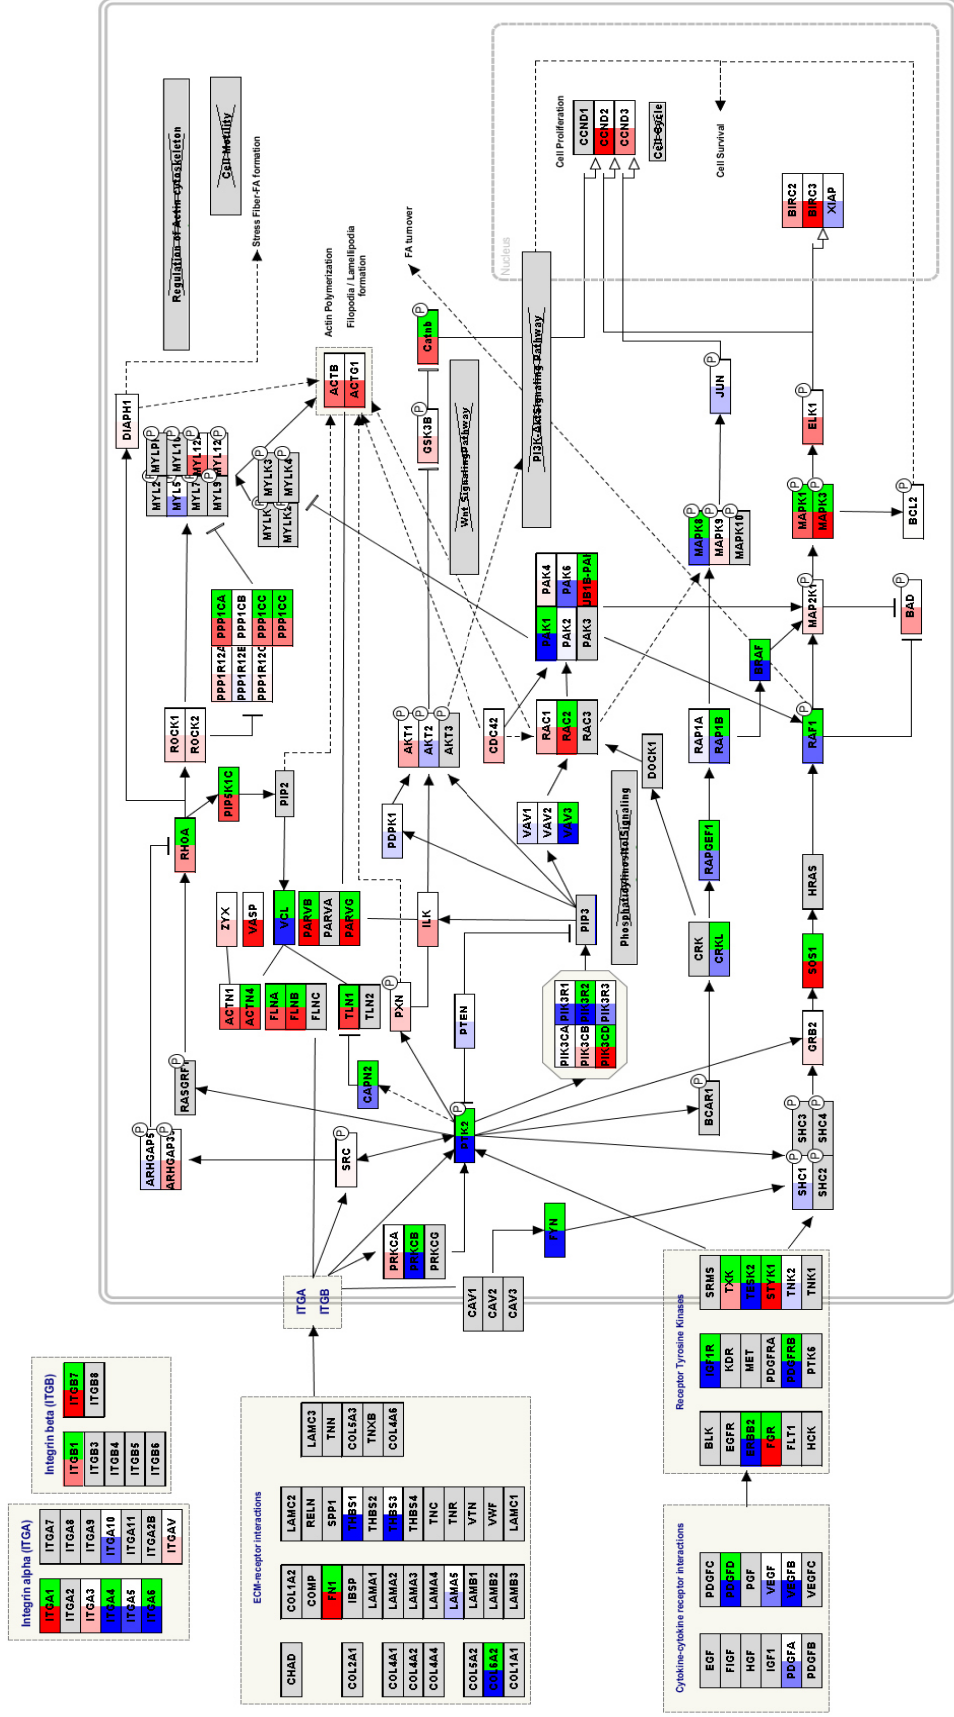

Supplemental Figure 5K. Pathway analysis of Focal Adhesion in CK-stimulated uNK versus CK-stimulated pNK.



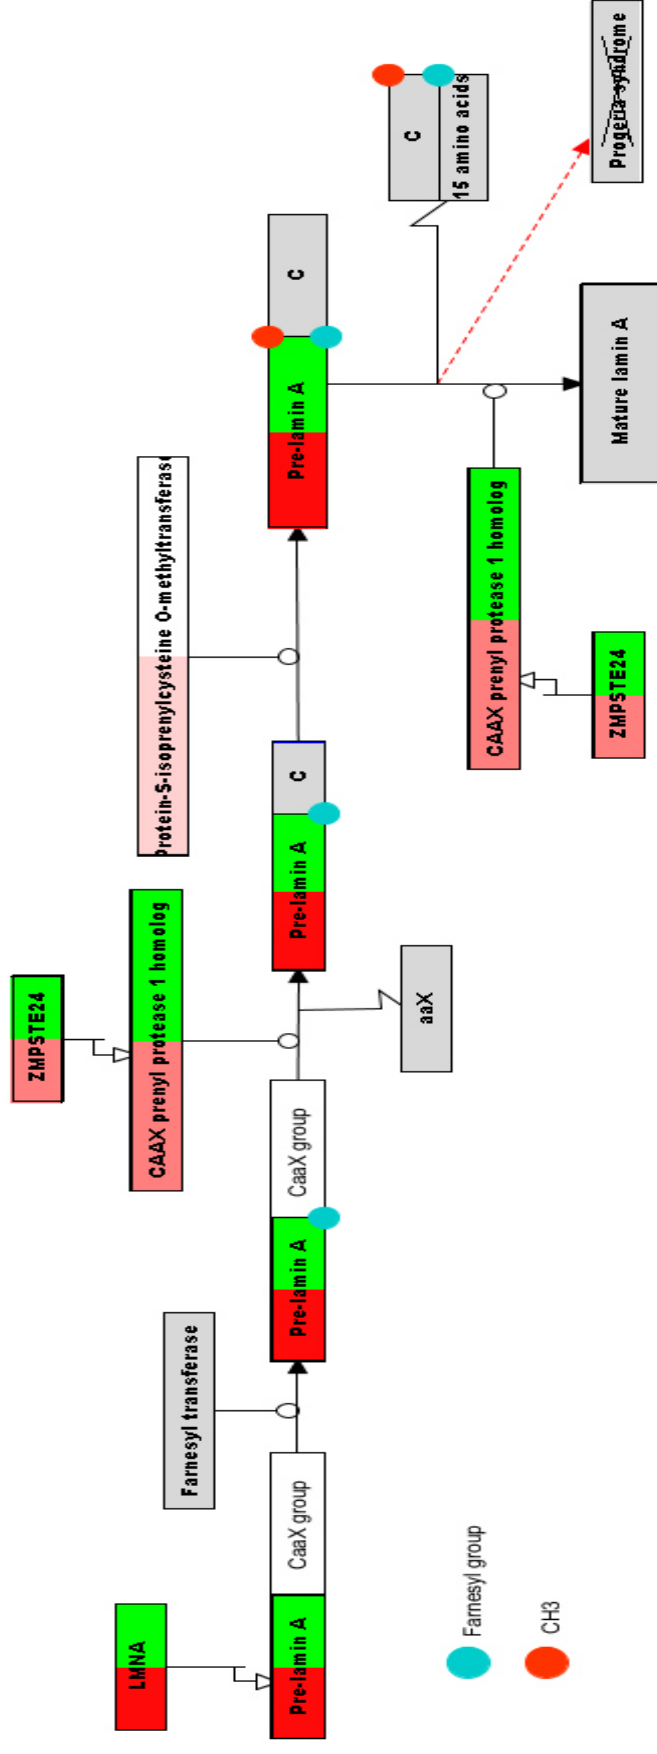

Supplemental Figure 5M. Pathway analysis of the Lamin A-processing pathway signalling in CK-stimulated uNK versus CK-stimulated pNK.

Title: Signal Transduction of S1P Recept

Availability: CC BY 2.0

Organism: Homo sapiens

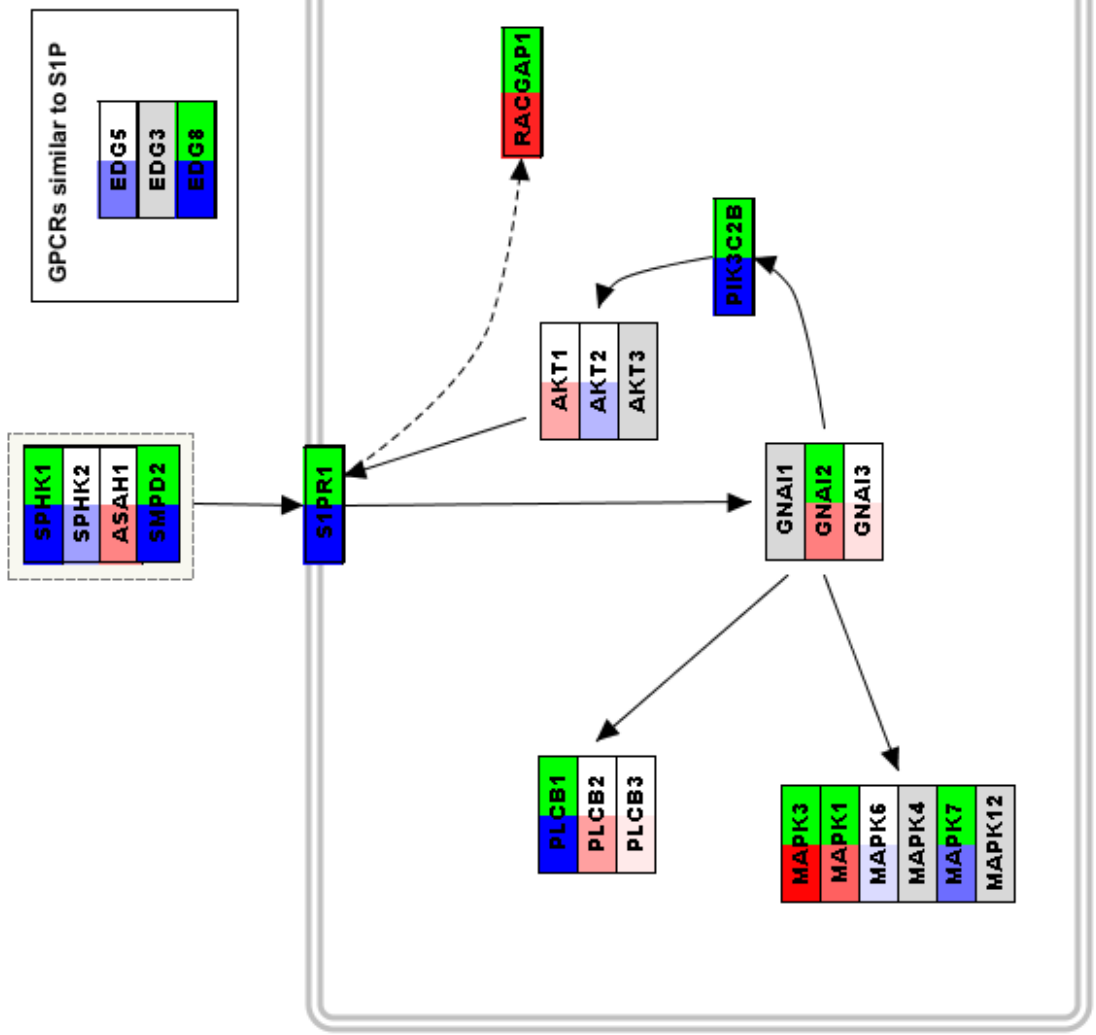

Supplemental Figure 5N. Pathway analysis of Signal Transduction of S1P Receptor signalling in CK-stimulated uNK versus CK-stimulated pNK.

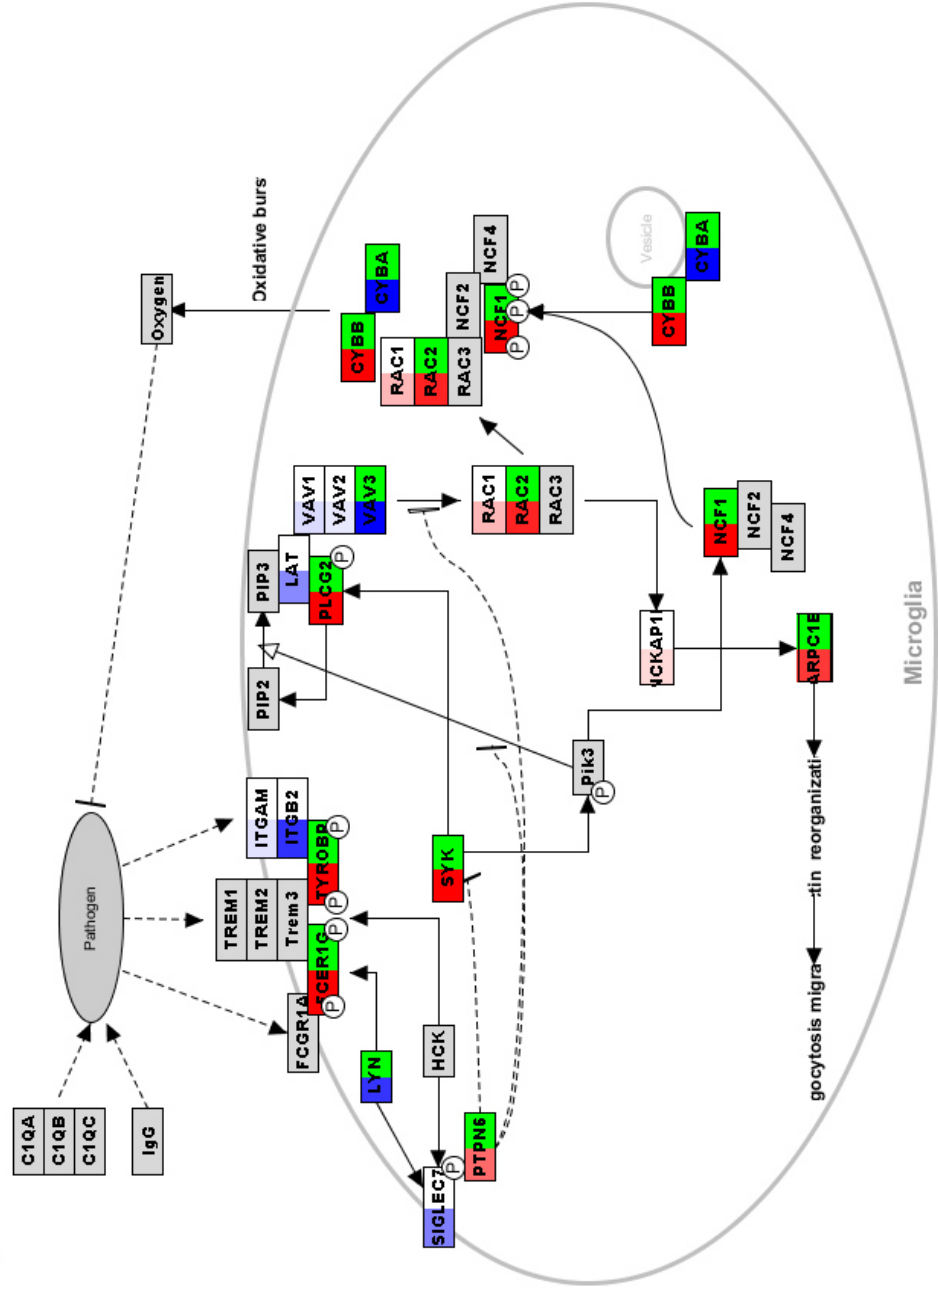

Supplemental Figure 50. Pathway analysis of Microglia Pathogen Phagocytosis Pathway in CK-stimulated uNK versus CK-stimulated pNK.

Title: Histone Modifications  
 Organism: Homo sapiens

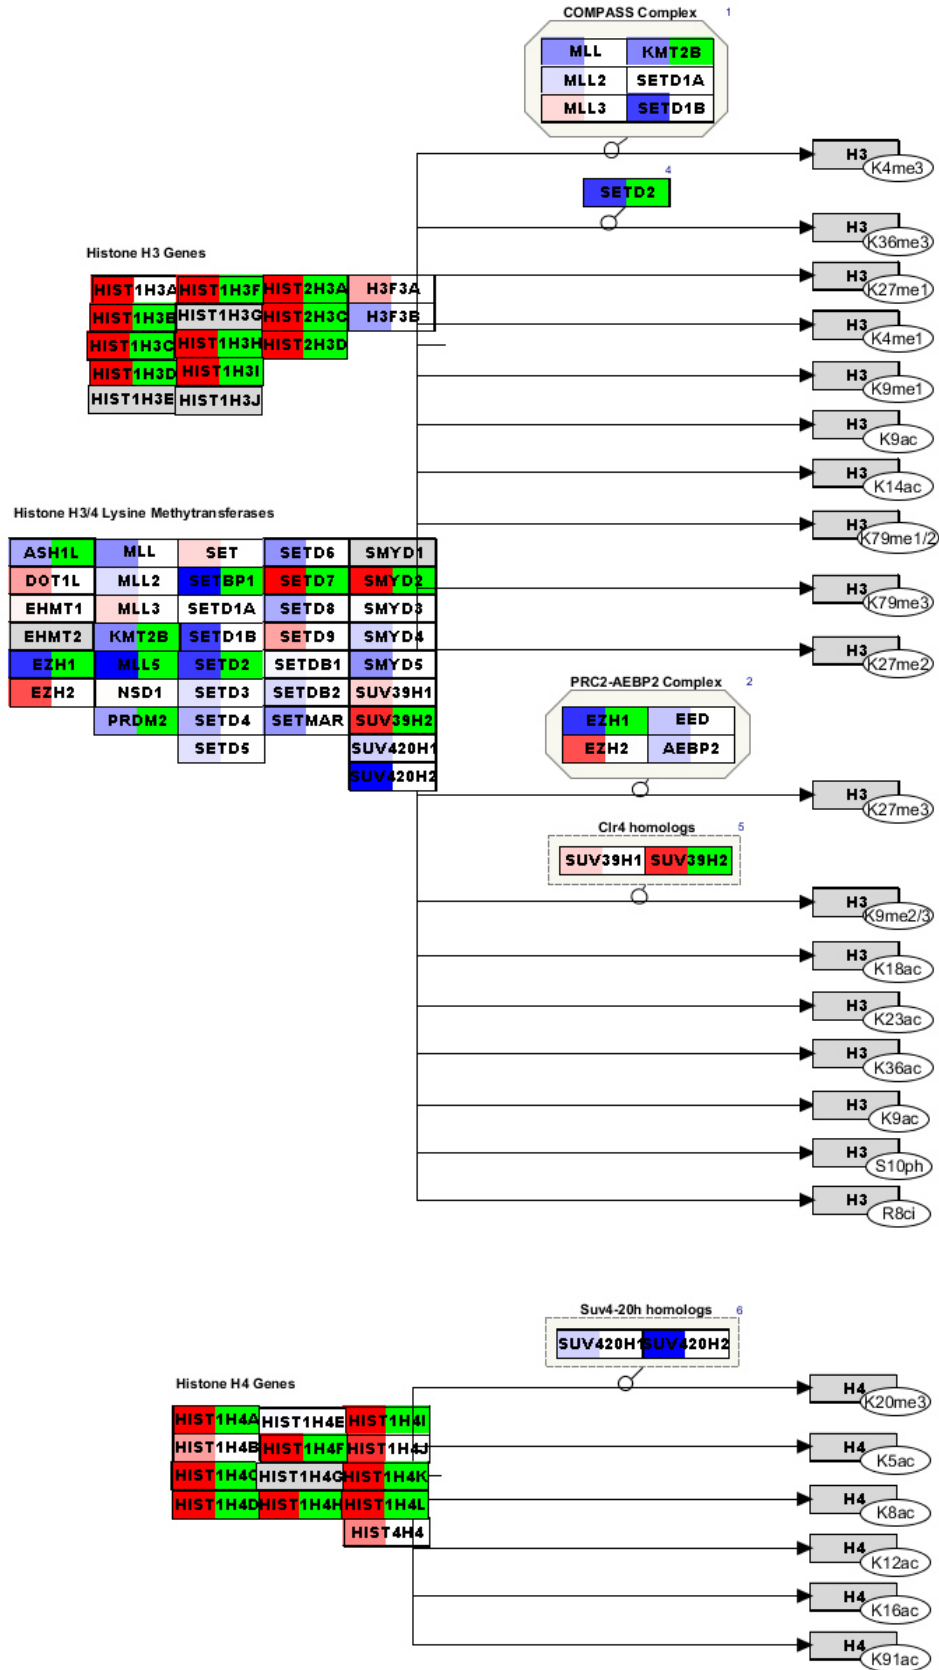

Supplemental Figure 5P. Pathway analysis of Histone Modifications in CK-stimulated uNK versus CK-stimulated pNK.



Title: Apoptosis-related network due to:  
Organism: Homo sapiens

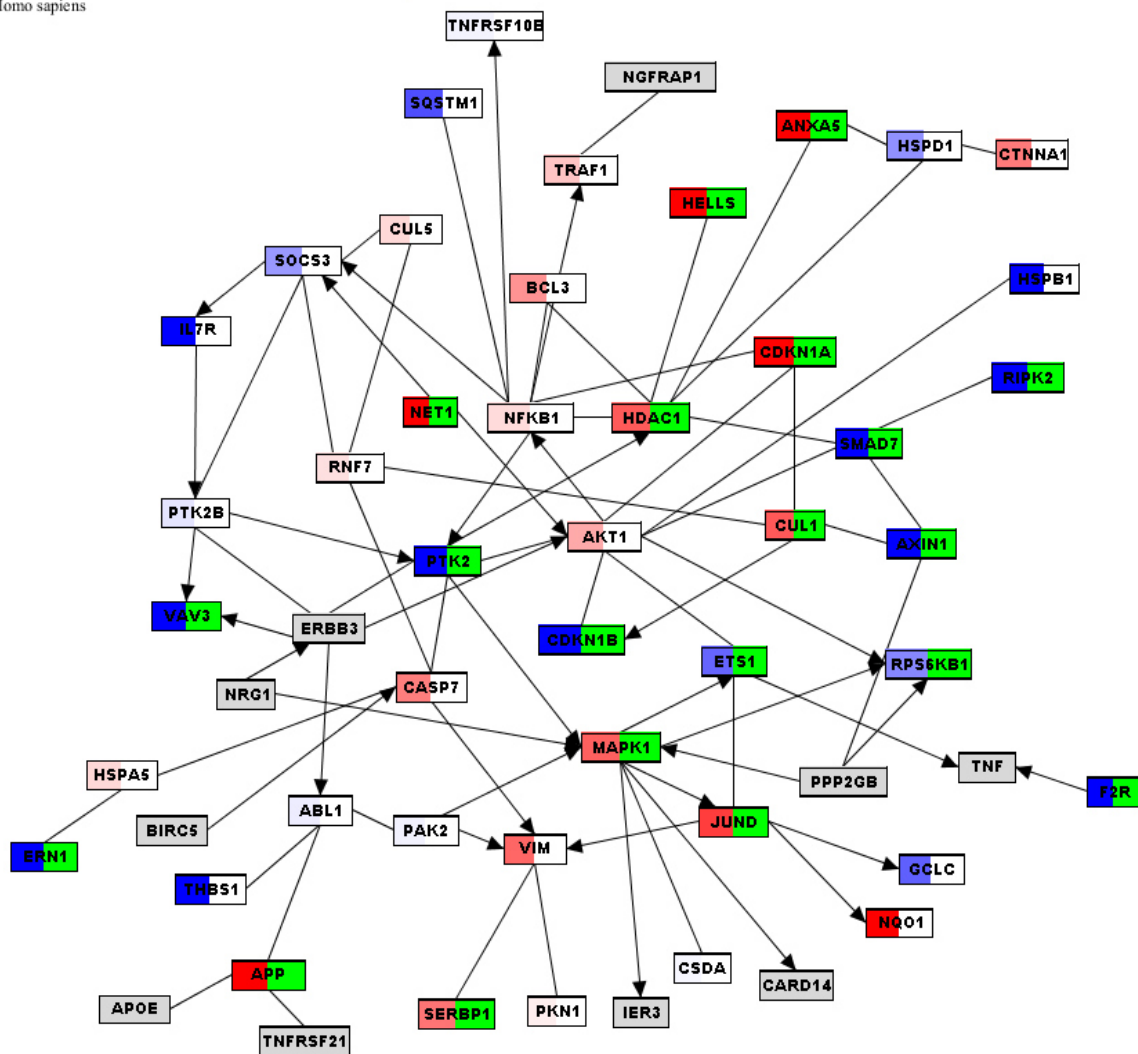

Supplemental Figure 5Q. Pathway analysis of Apoptosis-related network due to altered Notch3 in ovarian cancer in CK-stimulated uNK versus CK-stimulated pNK.

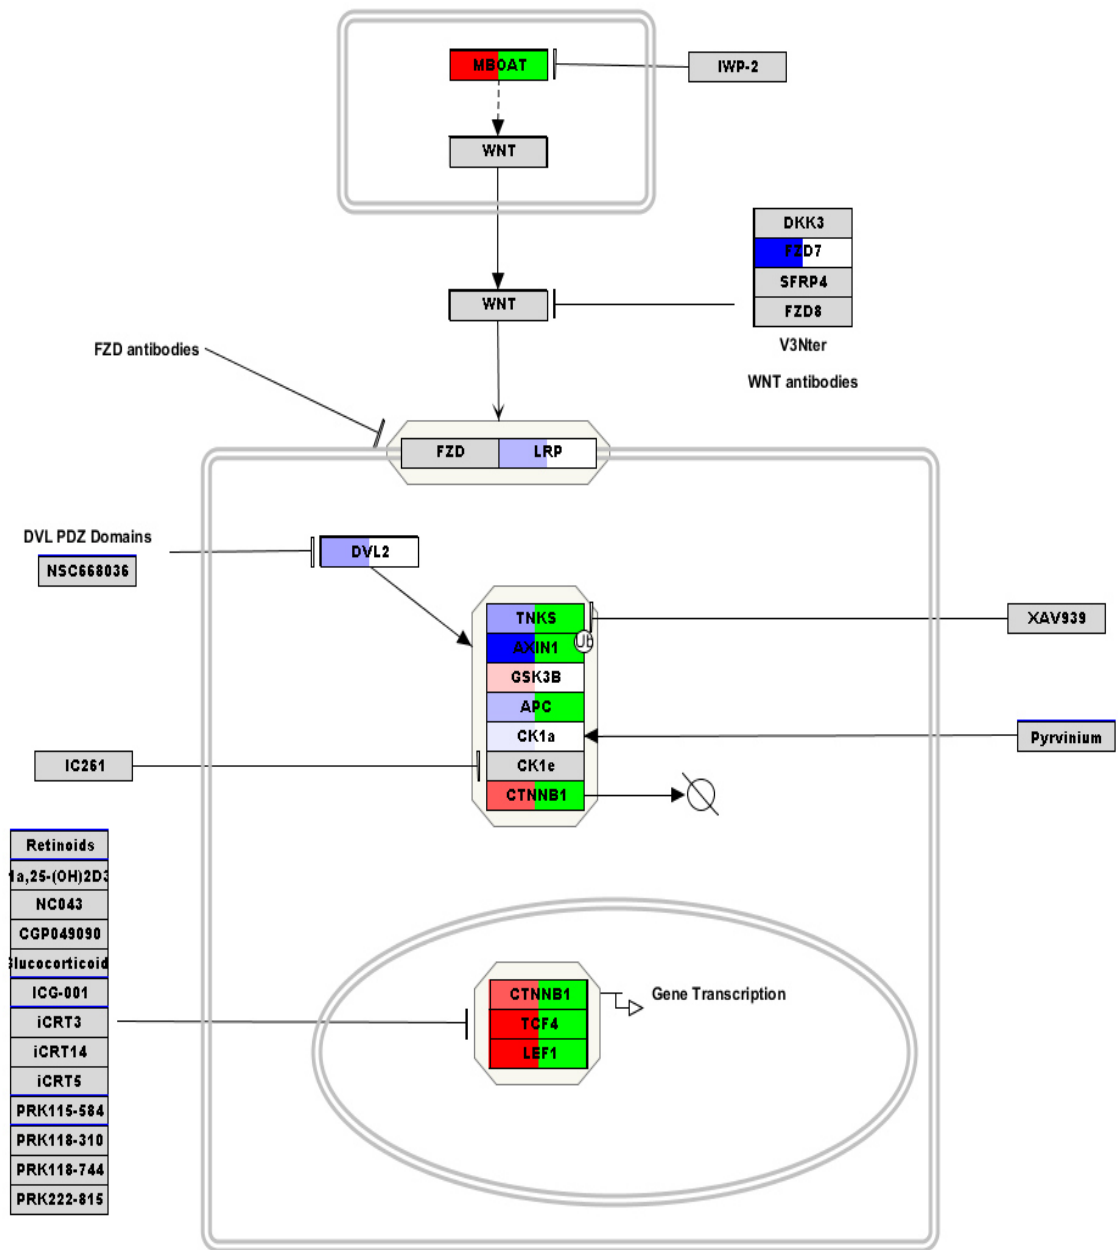

**Supplemental Figure 5R. Pathway analysis of Regulation of Wnt/B-catenin Signaling by Small Molecule Compounds in CK-stimulated uNK versus CK-stimulated pNK.**

Title: G Protein Signaling Pathways<sup>1, 2</sup>  
 Last modified: 10/16/2013  
 Organism: Homo sapiens

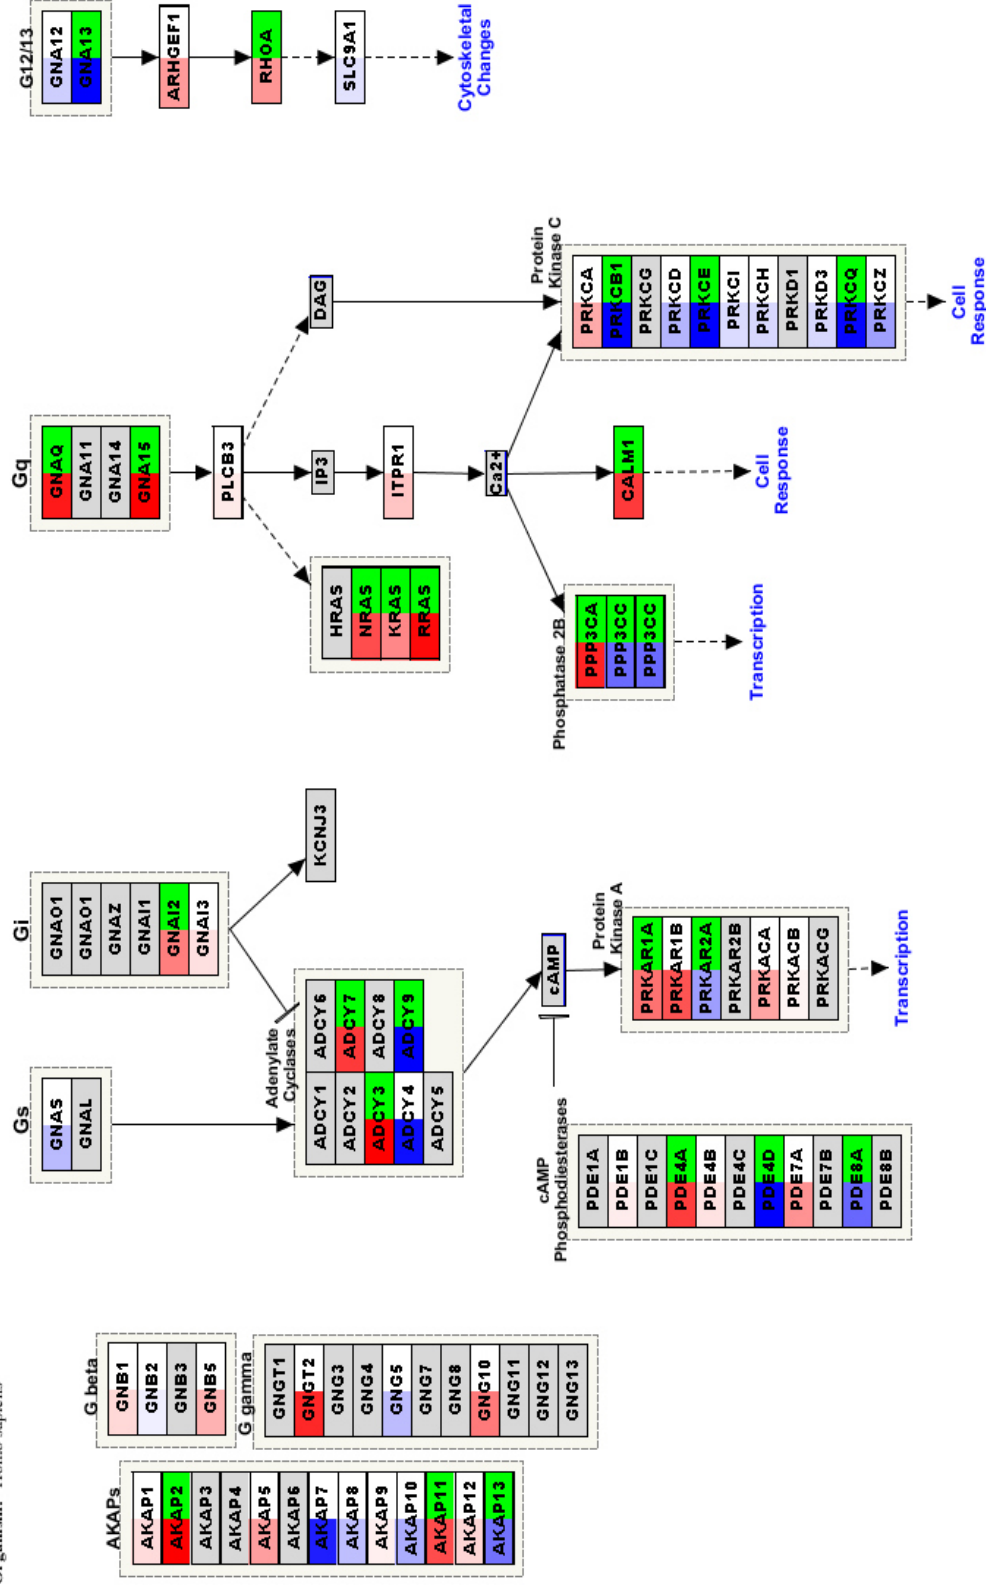

Supplemental Figure 5S. Pathway analysis of G Protein Signaling Pathways in CK-stimulated uNK versus CK-stimulated pNK.
